# Supplementary material for: Genome-Wide Analysis Reveals the Unique Stem Cell Identity of Human Amniocytes
Source: PubMed Central journal article supplement (PMC3542377; doi:10.1371/journal.pone.0053372), 2013-01-10
Supplement: pone.0053372.s001.pdf [file pone.0053372.s001.pdf]

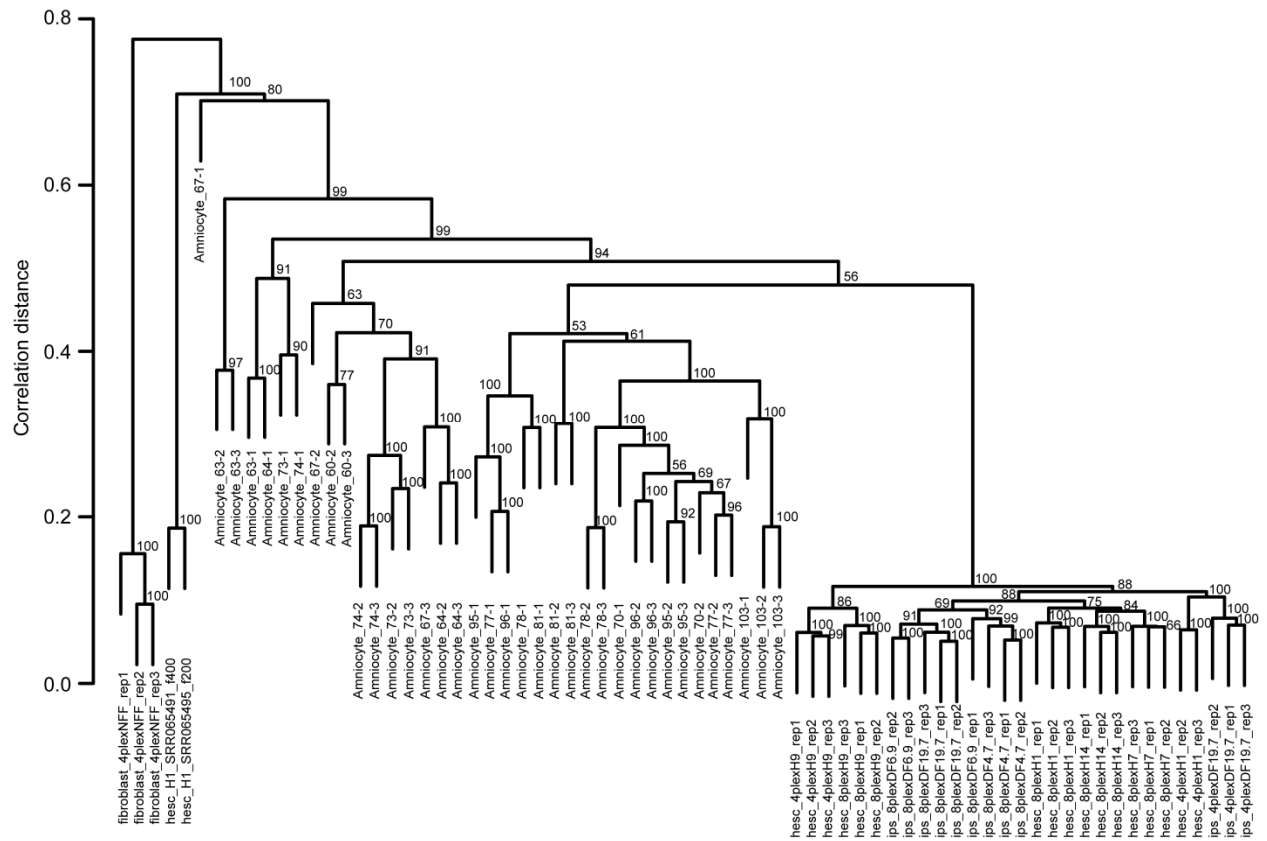

**Figure S1.** Hierarchical clustering analysis of all samples. RNA-seq datasets were generated from 1) amniocytes, 2) ESC (H1, H7, H9, and H14 cell lines); 2) iPSC; and 3) iPSC parental newborn foreskin fibroblasts (NFF). 71 samples clustered by variance-stabilized mRNA-seq read counts of 24,612 genes (mean read count > 4). Bootstrapping values are based on 100 randomized replicates. Correlation distance is  $1 - | \text{Pearson's } r |$ .
