# Supplementary material for: Genome-Wide Analysis Reveals the Unique Stem Cell Identity of Human Amniocytes
Source: PubMed Central journal article supplement (PMC3542377; doi:10.1371/journal.pone.0053372), 2013-01-10
Supplement: pone.0053372.s003.pdf [file pone.0053372.s003.pdf]

**Table S2.** Reference list for 250 stem cell markers. The 250 stem cell markers were included in our list based on the following two criteria; 1) each stem cell marker has a reported functional analysis in stem cells and 2) each gene was reliably detected at significant levels in our RNA-seq dataset for amniocytes or ESC and iPSC.

| Gene_Symbol   | Ensgene_id      | Refseq_id    | Gene_Function                                     | References |
|---------------|-----------------|--------------|---------------------------------------------------|------------|
| <i>Acvr2b</i> | ENSG00000114739 | NM_001106    | Receptor for activin A, activin B and inhibin A   | [1,2]      |
| <i>Alcam</i>  | ENSG00000170017 | NM_001627    | Cell adhesion, leukocytes, neural, cardiomyocytes | [3,4]      |
| <i>Arid1b</i> | ENSG00000049618 | NM_017519    | Trithorax group                                   | [5]        |
| <i>Ars2</i>   | ENSG00000087087 | NM_182800    | ESC identity                                      | [6,7]      |
| <i>Ash2l</i>  | ENSG00000129691 | NM_004674    | Trithorax group                                   | [8]        |
| <i>Axin2</i>  | ENSG00000168646 | NM_004655    | Wnt signaling                                     | [9]        |
| <i>Bmi1</i>   | ENSG00000168283 | NM_005180.8  | Polycomb group                                    | [10]       |
| <i>Brix</i>   | ENSG00000113460 | NM_018321    | Biogenesis of ribosomes                           | [11]       |
| <i>Cbx1</i>   | ENSG00000108468 | NM_006807    | Polycomb group                                    | [12]       |
| <i>Cbx5</i>   | ENSG00000094916 | NM_001127321 | Chromatin regulator                               | [12]       |
| <i>Ccna1</i>  | ENSG00000133101 | NM_003914    | Proliferation                                     | [13]       |
| <i>Ccnd1</i>  | ENSG00000110092 | NM_053056    | Proliferation                                     | [13,14]    |
| <i>Ccnd2</i>  | ENSG00000118971 | NM_001759    | Proliferation                                     | [13,14]    |
| <i>Ccne1</i>  | ENSG00000105173 | NM_001238    | Proliferation                                     | [13,14]    |
| <i>Ccnf</i>   | ENSG00000162063 | NM_001761    | Proliferation                                     | [15]       |
| <i>Cd24</i>   | ENSG00000185275 | NM_013230    | B-cell activation responses                       | [16]       |
| <i>Cd44</i>   | ENSG00000026508 | NM_000610.3  | Receptor for hyaluronic acid                      | [17]       |
| <i>Cd9</i>    | ENSG00000010278 | NM_001769    | Platelet activation                               | [18]       |
| <i>Cdh3</i>   | ENSG00000062038 | NM_001793    | Adhesion                                          | [18]       |
| <i>Cdk2</i>   | ENSG00000123374 | NM_001798    | Proliferation                                     | [13,14]    |
| <i>Cdk4</i>   | ENSG00000135446 | NM_000075    | Proliferation                                     | [13,14]    |
| <i>Cdk6</i>   | ENSG00000105810 | NM_001145306 | Proliferation                                     | [13]       |
| <i>Cdkn1b</i> | ENSG00000111276 | NM_004064    | Proliferation                                     | [13,19]    |
| <i>Cdyl</i>   | ENSG00000153046 | NR_026590    | Transcriptional repressor                         | [20]       |
| <i>Chd1</i>   | ENSG00000153922 | NM_001270    | Nucleosome mobilization                           | [21]       |
| <i>Chd7</i>   | ENSG00000171316 | NM_017780    | Nucleosome mobilization                           | [22,23]    |
| <i>Cks1b</i>  | ENSG00000173207 | NM_001826    | Proliferation                                     | [24,25]    |

|               |                 |              |                                                 |         |
|---------------|-----------------|--------------|-------------------------------------------------|---------|
| <i>Cldn6</i>  | ENSG00000184697 | NM_021195    | ESC marker                                      | [25]    |
| <i>Cnot1</i>  | ENSG00000125107 | NM_016284    | ESC identity                                    | [26]    |
| <i>Cnot2</i>  | ENSG00000111596 | NM_001199302 | ESC identity                                    | [26]    |
| <i>Cnot3</i>  | ENSG00000088038 | NM_014516    | Myc/Zfx cofactor                                | [26]    |
| <i>Cops2</i>  | ENSG00000113387 | NM_001143887 | Cop9 signalsome                                 | [27]    |
| <i>Cops4</i>  | ENSG00000138663 | NM_001258006 | Cop9 signalsome                                 | [27]    |
| <i>Cpsf3</i>  | ENSG00000119203 | NM_016207    | mRNA precursor processor                        | [28]    |
| <i>Crabp1</i> | ENSG00000166426 | NM_004378    | Retinoic acid regulation                        | [29]    |
| <i>Dazap1</i> | ENSG00000071626 | NM_018959    | RNA-binding protein                             | [28]    |
| <i>Dnmt3b</i> | ENSG00000088305 | NM_001207055 | DNA methylation                                 | [25]    |
| <i>Dppa2</i>  | ENSG00000163530 | NM_138815    | Pluripotency                                    | [30]    |
| <i>Dppa3</i>  | ENSG00000187569 | NM_199286    | Pre-Postimplantation/<br>Germline determination | [31,32] |
| <i>Dppa4</i>  | ENSG00000121570 | NM_018189    | Pluripotency                                    | [30]    |
| <i>Dppa5</i>  | ENSG00000203909 | NM_001025290 | Pluripotency                                    | [33]    |
| <i>Dpy30</i>  | ENSG00000162961 | NM_032574    | Epigenetic methylation                          | [34,35] |
| <i>E2f1</i>   | ENSG00000101412 | NM_005225    | Transcription regulator                         | [36]    |
| <i>Eed</i>    | ENSG00000074266 | NM_003797    | Polycomb group                                  | [37]    |
| <i>Ehmt2</i>  | ENSG00000204371 | NM_006709    | Chromatin regulator                             | [38]    |
| <i>Eif2b1</i> | ENSG00000111361 | NM_001414    | EIF complex                                     | [27]    |
| <i>Eif2b2</i> | ENSG00000119718 | NM_014239    | EIF complex                                     | [27]    |
| <i>Eif2b3</i> | ENSG00000070785 | NM_001166588 | EIF complex                                     | [27]    |
| <i>Eif2s2</i> | ENSG00000125977 | NM_003908    | EIF complex                                     | [27]    |
| <i>Epcam</i>  | ENSG00000119888 | NM_002354    | Adhesion                                        | [18]    |
| <i>Eras</i>   | ENSG00000187682 | NM_181532    | Self-renewal                                    | [39]    |
| <i>Esrrb</i>  | ENSG00000119715 | NM_004452    | Steroid hormone receptor                        | [40,41] |
| <i>Ewsr1</i>  | ENSG00000182944 | NM_001163285 | Transcription regulator                         | [42]    |
| <i>Ezh1</i>   | ENSG00000108799 | NM_001991    | Polycomb group                                  | [43]    |
| <i>Ezh2</i>   | ENSG00000106462 | NM_001203247 | Polycomb group                                  | [44]    |
| <i>Fbxo15</i> | ENSG00000141665 | NM_001142958 | Transcription regulator                         | [45]    |
| <i>Fgf13</i>  | ENSG00000129682 | NM_004114    | Differentiation                                 | [46]    |
| <i>Fgf4</i>   | ENSG00000075388 | NM_002007    | Segregation                                     | [47]    |
| <i>Flt3</i>   | ENSG00000122025 | NM_004119    | Receptor for fms-related tyrosine kinase        | [48]    |

|                |                 |              |                                      |         |
|----------------|-----------------|--------------|--------------------------------------|---------|
| <i>Foxd3</i>   | ENSG00000187140 | NM_012183    | ECS repressor                        | [49]    |
| <i>Foxh1</i>   | ENSG00000160973 | NM_003923    | Transcriptional regulator            | [50]    |
| <i>Fry</i>     | ENSG00000073910 | NM_023037    |                                      |         |
| <i>Fut4</i>    | ENSG00000196371 | NM_002033    | Catalyzes synthesis of SSEA1         | [51]    |
| <i>Fut9</i>    | ENSG00000172461 | NM_006581    | Catalyzes synthesis of SSEA1         | [51]    |
| <i>Gabrb3</i>  | ENSG00000166206 | NM_000814    | Ligand-gated ionic channel           | [11]    |
| <i>Gal</i>     | ENSG00000069482 | NM_015973    | Cellular messenger                   | [52]    |
| <i>Gbx2</i>    | ENSG00000168505 | NM_001485    | Transcriptional regulator            | [53]    |
| <i>Gdf3</i>    | ENSG00000184344 | NM_020634    | Cell growth and differentiation      | [54]    |
| <i>Gja1</i>    | ENSG00000152661 | NM_000165    | Cell-cell communication              | [55]    |
| <i>Gli1</i>    | ENSG00000111087 | NM_001167609 | Transcriptional regulator            | [56]    |
| <i>Gli2</i>    | ENSG00000074047 | NM_005270    | Transcriptional regulator            | [56]    |
| <i>Gli3</i>    | ENSG00000106571 | NM_000168.5  | ESC repressor                        | [56]    |
| <i>Glis1</i>   | ENSG00000174332 | NM_147193    | Transcriptional regulator            | [57]    |
| <i>Gnl3</i>    | ENSG00000163938 | NM_014366.4  | Proliferation                        | [58]    |
| <i>Grb7</i>    | ENSG00000141738 | NM_001030002 | RNA-binding protein                  | [59,60] |
| <i>H2afz</i>   | ENSG00000164032 | NM_002106    | Chromatin regulator                  | [61]    |
| <i>Has2</i>    | ENSG00000170961 | NM_005328    | Hyaluronan/hyaluronic acid synthesis | [62]    |
| <i>Hcfc1</i>   | ENSG00000172534 | NM_005334    | Proliferation                        | [63]    |
| <i>Herc5</i>   | ENSG00000138646 | NM_016323    | E3 ligase                            | [64]    |
| <i>Hesx1</i>   | ENSG00000163666 | NM_003865    | Transcriptional repressor            | [25,65] |
| <i>Hira</i>    | ENSG00000100084 | NM_003325    | Histone cell cycle regulator         | [28]    |
| <i>Hmga1</i>   | ENSG00000137309 | NM_002131    | Transcriptional regulation           | [25]    |
| <i>Hspa4</i>   | ENSG00000170606 | NM_198431    | Heat shock protein                   | [66]    |
| <i>Hspb1</i>   | ENSG00000106211 | NM_001540    | Heat shock protein                   | [67]    |
| <i>Id1</i>     | ENSG00000125968 | NM_002165    | ESC identity                         | [68]    |
| <i>Id2</i>     | ENSG00000115738 | NM_002166    | ESC identity                         | [68]    |
| <i>Igf2bp1</i> | ENSG00000159217 | NM_001160423 | Proliferation                        | [69,70] |

|               |                 |              |                                                      |            |
|---------------|-----------------|--------------|------------------------------------------------------|------------|
| <i>Ing5</i>   | ENSG00000168395 | NM_032329    | Transcriptional regulator                            | [28]       |
| <i>Itga6</i>  | ENSG00000091409 | NM_001079818 | ECM receptor                                         | [71,72]    |
| <i>Jarid2</i> | ENSG00000008083 | NM_004973    | Histone methyltransferase regulator/<br>pluripotency | [73]       |
| <i>Kat2a</i>  | ENSG00000108773 | NM_021078    | Chromatin regulator                                  | [74,75]    |
| <i>Kat5</i>   | ENSG00000172977 | NM_182710    | Histone acetylation                                  | [76,77]    |
| <i>Kat6a</i>  | ENSG00000083168 | NM_001099413 | Histone acetylation                                  | [78,79]    |
| <i>Kdm1a</i>  | ENSG00000004487 | NM_001009999 | Proliferation                                        | [80]       |
| <i>Kdm3a</i>  | ENSG00000115548 | NM_001146688 | Cofactors                                            | [81,82]    |
| <i>Kdm4a</i>  | ENSG00000066135 | NM_014663    | Cofactors                                            | [83]       |
| <i>Kdm4c</i>  | ENSG00000107077 | NM_001146694 | Cofactors                                            | [83]       |
| <i>Kdm5b</i>  | ENSG00000117139 | NM_006618    | Proliferation                                        | [84,85]    |
| <i>Kit</i>    | ENSG00000157404 | NM_000222    | Stem cell factor receptor                            | [86,87]    |
| <i>Kitlg</i>  | ENSG00000049130 | NM_000899    | Pleiotropic stem cell factor                         | [88]       |
| <i>Klf12</i>  | ENSG00000118922 | NM_016285    | ES Identity                                          | [89]       |
| <i>Klf2</i>   | ENSG00000127528 | NM_016270    | Transcription regulator                              | [90,91]    |
| <i>Klf4</i>   | ENSG00000136826 | NM_004235    | Transcription regulator                              | [90,91]    |
| <i>Klf5</i>   | ENSG00000102554 | NM_001730    | Transcription regulator                              | [90,92,93] |
| <i>L1td1</i>  | ENSG00000240563 | NM_001164835 | MicroRNA processor                                   | [94,95]    |
| <i>Lefty1</i> | ENSG00000243709 | NM_020997    | Left-right asymmetry determination                   | [91,96]    |
| <i>Lefty2</i> | ENSG00000143768 | NM_003240    | Left-right asymmetry determination                   | [97,98]    |
| <i>Lin28a</i> | ENSG00000131914 | NM_024674    | MicroRNA processor                                   | [12,25,99] |
| <i>Lin28b</i> | ENSG00000187772 | NM_001004317 | MicroRNA processor                                   | [100,101]  |
| <i>Ly6e</i>   | ENSG00000160932 | NM_001127213 | Adhesion and signaling                               | [102]      |
| <i>Mapk1</i>  | ENSG00000100030 | NM_002745    | Pleiotropic cellular processes                       | [47]       |
| <i>Max</i>    | ENSG00000125952 | NM_002382    | Transcription regulator                              | [103,104]  |
| <i>Mcm2</i>   | ENSG00000073111 | NM_004526.2  | Replicative                                          | [105]      |

|               |                 |              |                                          |           |
|---------------|-----------------|--------------|------------------------------------------|-----------|
|               |                 |              | helicase factor                          |           |
| <i>Mcrs1</i>  | ENSG00000187778 | NM_001012300 | INO80 complex                            | [27,106]  |
| <i>Med1</i>   | ENSG00000125686 | NM_004774    | Mediator complex                         | [107,108] |
| <i>Med10</i>  | ENSG00000133398 | NM_032286    | Mediator complex                         | [109]     |
| <i>Med12</i>  | ENSG00000184634 | NM_005120    | Mediator complex                         | [110]     |
| <i>Med13</i>  | ENSG00000108510 | NM_005121    | Mediator complex                         | [27]      |
| <i>Med13l</i> | ENSG00000123066 | NM_015335    | Mediator complex                         | [27]      |
| <i>Med14</i>  | ENSG00000180182 | NM_004229    | Mediator complex                         | [27]      |
| <i>Med17</i>  | ENSG00000042429 | NM_004268    | Mediator complex                         | [27]      |
| <i>Med19</i>  | ENSG00000156603 | NM_153450    | Mediator complex                         | [27]      |
| <i>Med24</i>  | ENSG00000008838 | NM_001079518 | Mediator complex                         | [27]      |
| <i>Med28</i>  | ENSG00000118579 | NM_025205    | Mediator complex                         | [27]      |
| <i>Metap2</i> | ENSG00000111142 | NM_006838    | Nascent protein processor                | [28]      |
| <i>Mga</i>    | ENSG00000174197 | NM_001080541 | Transcriptional regulator                | [111]     |
| <i>Mll</i>    | ENSG00000118058 | NM_005933    | Trithorax group                          | [112-114] |
| <i>Mll2</i>   | ENSG00000167548 | NM_003482    | Trithorax group                          | [115,116] |
| <i>Mll3</i>   | ENSG00000055609 | NM_170606    | Trithorax group                          | [117,118] |
| <i>Mll5</i>   | ENSG00000005483 | NM_018682    | Trithorax group                          | [119,120] |
| <i>Msi1</i>   | ENSG00000135097 | NM_002442    | Neural stem cell marker                  | [121,122] |
| <i>Mt1a</i>   | ENSG00000205362 | NM_005946    | NuRD complex component                   | [123,124] |
| <i>Mt2a</i>   | ENSG00000125148 | NM_005953    | NuRD complex component                   | [125]     |
| <i>Mtf2</i>   | ENSG00000143033 | NM_001164391 | Cofactors                                | [73]      |
| <i>Mthfd1</i> | ENSG00000100714 | NM_005956    | NADP+ dependent dehydrogenase            | [126]     |
| <i>Mybl2</i>  | ENSG00000101057 | NM_002466    | Transcription Regulator                  | [127]     |
| <i>Myc</i>    | ENSG00000136997 | NM_002467    | Proliferation                            | [128,129] |
| <i>Mycn</i>   | ENSG00000134323 | NM_005378    | Transcription regulator                  | [130]     |
| <i>Nacc1</i>  | ENSG00000160877 | NM_052876    | Transcription regulator                  | [131]     |
| <i>Nanog</i>  | ENSG00000111704 | NM_024865    | Core pluripotency factor                 | [132,133] |
| <i>Nanos1</i> | ENSG00000188613 | NM_001009553 | Translational repressor                  | [134]     |
| <i>Ncam1</i>  | ENSG00000149294 | NM_000615.6  | Adhesion                                 | [135]     |
| <i>Ncoa2</i>  | NSG00000140396  | NM_006540    | Steroid and nuclear receptor coactivator | [136]     |
| <i>Ncoa3</i>  | ENSG00000124151 | NM_006534    | Steroid and nuclear receptor             | [28]      |

|                |                 |              |                                                  |                |
|----------------|-----------------|--------------|--------------------------------------------------|----------------|
|                |                 |              | coactivator                                      |                |
| <i>Nfrkb</i>   | ENSG00000170322 | NM_001143835 | INO80 complex                                    | [27]           |
| <i>Nodal</i>   | ENSG00000156574 | NM_018055    | Stem Cell Marker/Mesoderm Inducer                | [137,138]      |
| <i>Npr1</i>    | ENSG00000169418 | NM_000906    | ESC identity                                     | [139]          |
| <i>Nr0b1</i>   | ENSG00000169297 | NM_000475    | Oct4 Inhibitor                                   | [140,141]      |
| <i>Nr6a1</i>   | ENSG00000148200 | NM_001489    | Trophoblast/ESC maintenance/Proliferation/Neural | [142]          |
| <i>Nts</i>     | ENSG00000133636 | NM_006183    | Neuromodulator                                   | [28]           |
| <i>Onecut2</i> | ENSG00000119547 | NM_004852    | Transcriptional regulator                        | [143]          |
| <i>Otx1</i>    | ENSG00000115507 | NM_001199770 | Transcription factor                             | [144]          |
| <i>Otx2</i>    | ENSG00000165588 | NM_021728    | Transcription factor                             | [145]          |
| <i>Paf1</i>    | ENSG00000006712 | NM_019088    | Couples Transcription with Histone Modification  | [146]          |
| <i>Pcgf6</i>   | ENSG00000156374 | NM_001011663 | Cofactors                                        | [146]          |
| <i>Pcid2</i>   | ENSG00000126226 | NM_001127202 | Proliferation and survival                       | [28]           |
| <i>Pcna</i>    | ENSG00000132646 | NM_002592    | DNA replication and repair                       | [147,148]      |
| <i>Phc1</i>    | ENSG00000111752 | NM_004426    | Polycomb group                                   | [149]          |
| <i>Phc2</i>    | ENSG00000134686 | NM_004427    | Polycomb group                                   | [150]          |
| <i>Phc3</i>    | ENSG00000173889 | NM_024947    | Polycomb group                                   | [151]          |
| <i>Pim2</i>    | ENSG00000102096 | NM_006875    | ESC identity                                     | [152]          |
| <i>Podxl</i>   | ENSG00000128567 | NM_001018111 | Adhesion and cell morphology                     | [1,11,153,154] |
| <i>Pou5f1</i>  | ENSG00000204531 | NM_001173531 | Core pluripotency factor                         | [155,156]      |
| <i>Ppp1r3d</i> | ENSG00000132825 | NM_006242    | Proliferation                                    | [70,157]       |
| <i>Prdm14</i>  | ENSG00000147596 | NM_024504    | ESC identity                                     | [27,158]       |
| <i>Prdm16</i>  | ENSG00000142611 | NM_022114    | ESC identity                                     | [159]          |
| <i>Prdm5</i>   | ENSG00000138738 | NM_018699    | ESC identity                                     | [160]          |
| <i>Prmt6</i>   | ENSG00000198890 | NM_018137    | ESC identity                                     | [161]          |
| <i>Prom1</i>   | ENSG00000007062 | NM_001145847 | Stem cell maintenance                            | [162]          |
| <i>Ptprz1</i>  | ENSG00000106278 | NM_002851    | Developmental regulator                          | [163]          |
| <i>Pum1</i>    | ENSG00000134644 | NM_001020658 | Stem cell maintenance                            | [164]          |
| <i>Pum2</i>    | ENSG00000055917 | NM_015317    | Stem cell maintenance                            | [164]          |

|               |                 |                |                                               |               |
|---------------|-----------------|----------------|-----------------------------------------------|---------------|
| <i>Rad21</i>  | ENSG00000164754 | NM_006265      | ESC identity                                  | [165]         |
| <i>Rb1</i>    | ENSG00000139687 | NM_000321      | Proliferation                                 | [13]          |
| <i>Rbbp4</i>  | ENSG00000162521 | NM_005610      | Polycomb group                                | [166]         |
| <i>Rbbp5</i>  | ENSG00000117222 | NM_001193272   | Polycomb group                                | [167]         |
| <i>Rbbp7</i>  | ENSG00000102054 | NM_001198719   | Polycomb group                                | [168]         |
| <i>Rbbp9</i>  | ENSG00000089050 | NM_006606      | Stem cell maintenance                         | [166]         |
| <i>Rbl2</i>   | ENSG00000103479 | NM_005611      | Transcription regulator                       | [169]         |
| <i>Rbx1</i>   | ENSG00000100387 | NM_014248      | Ubiquitination                                | [28]          |
| <i>Rest</i>   | ENSG00000084093 | NM_001193508.1 | Transcription regulator                       | [170]         |
| <i>Rif1</i>   | ENSG00000080345 | NM_001177664   | DNA repair                                    | [171]         |
| <i>Ring1</i>  | ENSG00000204227 | NM_002931      | Polycomb group                                | [172,173]     |
| <i>Rnf2</i>   | ENSG00000121481 | NM_007212      | Ubiquitination and epigenetic repression      | [28]          |
| <i>Rtf1</i>   | ENSG00000137815 | NM_015138      | Transcription elongation/chromatin remodeling | [174]         |
| <i>Sall1</i>  | ENSG00000103449 | NM_001127892.1 | Transcription regulator                       | [175]         |
| <i>Sall4</i>  | ENSG00000101115 | NM_020436      | ICM/ESC repressor                             | [176-179]     |
| <i>Sema4a</i> | ENSG00000196189 | NM_001193300   | Multifunctional cell signaling                | [28]          |
| <i>Setdb1</i> | ENSG00000143379 | NM_012432      | Silencing of lineage-specific regulators      | [180-182]     |
| <i>Setdb2</i> | ENSG00000136169 | NM_031915      | Silencing of lineage-specific regulators      | [1]           |
| <i>Sf3a1</i>  | ENSG00000099995 | NM_001005409   | Spliceosome complex                           | [27]          |
| <i>Sf3a3</i>  | ENSG00000183431 | NM_006802      | Spliceosome complex                           | [27]          |
| <i>Sfrp2</i>  | ENSG00000145423 | NM_003013      | Wnt signaling                                 | [183]         |
| <i>Sirt2</i>  | ENSG00000068903 | NM_001193286   | Chromatin regulator                           | [184]         |
| <i>Skil</i>   | ENSG00000136603 | NM_005414      | Cell division and differentiation             | [185]         |
| <i>Smad1</i>  | ENSG00000170365 | NM_001003688   | BMP signaling to core circuitry               | [186]         |
| <i>Smad2</i>  | ENSG00000175387 | NM_001135937   | TGF- $\beta$ /Activin/Nodal signaling         | [137,138,187] |
| <i>Smad3</i>  | ENSG00000166949 | NM_001145102   | TGF- $\beta$ /Activin/Nodal                   | [137,138,187] |

|                |                 |              |                                           |              |
|----------------|-----------------|--------------|-------------------------------------------|--------------|
|                |                 |              | signaling                                 |              |
| <i>Smarca4</i> | ENSG00000127616 | NM_001128849 | Chromatin regulator                       | [188]        |
| <i>Smarca5</i> | ENSG00000153147 | NM_003601    | Chromatin regulator                       | [12]         |
| <i>Smarcd1</i> | ENSG00000163104 | NM_020159    | Chromatin regulator                       | [189]        |
| <i>Smarcb1</i> | ENSG00000099956 | NM_001007468 | Chromatin regulator                       | [190]        |
| <i>Smarcc1</i> | ENSG00000094916 | NM_001127321 | Chromatin regulator                       | [191]        |
| <i>Smarcd1</i> | ENSG00000066117 | NM_003076    | Chromatin regulator                       | [189]        |
| <i>Smc1a</i>   | ENSG00000072501 | NM_006306    | Chromosome cohesion/DNA repair            | [192]        |
| <i>Smo</i>     | ENSG00000128602 | NM_005631    | Hedgehog signaling                        | [193,194]    |
| <i>Sox2</i>    | ENSG00000181449 | NM_003106    | Core pluripotency factor                  | [25,144,195] |
| <i>Sox3</i>    | ENSG00000134595 | NM_005634    | Transcription regulator                   | [196]        |
| <i>Sp1</i>     | ENSG00000185591 | NM_001251825 | Transcription regulator                   | [197,198]    |
| <i>Spp1</i>    | ENSG00000118785 | NM_000582    | Transcription regulator                   | [199]        |
| <i>Stag1</i>   | ENSG00000118007 | NM_005862    | Cohesin complex component/DNA replication | [165]        |
| <i>Stat3</i>   | ENSG00000168610 | NM_213662    | Lif signaling to core circuitry           | [200]        |
| <i>Sub1</i>    | ENSG00000113387 | NM_006713    | Spliceosome complex                       | [27]         |
| <i>Suv39h2</i> | ENSG00000152455 | NM_001193424 | Chromatin regulator                       | [201]        |
| <i>Suz12</i>   | ENSG00000178691 | NM_015355    | Polycomb group                            | [202]        |
| <i>Taf2</i>    | ENSG00000064313 | NM_003184    | TAF complex                               | [27]         |
| <i>Taf7</i>    | ENSG00000178913 | NM_005642    | TAF complex                               | [27]         |
| <i>Tcf3</i>    | ENSG00000071564 | NM_003200    | ES Cell Repressor                         | [203-205]    |
| <i>Tcf7l1</i>  | ENSG00000152284 | NM_031283    | Signaling Transcription factor            | [206]        |
| <i>Tcl1a</i>   | ENSG00000100721 | NM_001098725 | Signaling transcription factor            | [207]        |
| <i>Tdgf1</i>   | ENSG00000163828 | NM_003212    | ESC marker/Mesoderm Inducer               | [208,209]    |
| <i>Terf1</i>   | ENSG00000147601 | NM_003218    | Telomerase inhibitor                      | [1,209]      |



|                |                 |              |                                               |           |
|----------------|-----------------|--------------|-----------------------------------------------|-----------|
| <i>Tert</i>    | ENSG00000164362 | NM_198253    | Replication of chromosome termini             | [210]     |
| <i>Tgif</i>    | ENSG00000177426 | NM_003244    | Transcriptional regulator                     | [211]     |
| <i>Thap11</i>  | ENSG00000168286 | NM_020457.2  | Metabolism                                    | [212]     |
| <i>Thy1</i>    | ENSG00000154096 | NM_006288.3  | Cell-cell and cell-ligand interactions        | [213]     |
| <i>Tle1</i>    | ENSG00000196781 | NM_005077    | Transcriptional regulator                     | [214]     |
| <i>Tnfrsf8</i> | ENSG00000120949 | NM_001243    | Cellular growth                               | [215]     |
| <i>Top2a</i>   | ENSG00000131747 | NM_001067    | DNA topoisomerase                             | [12]      |
| <i>Trim16</i>  | ENSG00000221926 | NM_006470    | Tumor suppressor                              | [28,216]  |
| <i>Trim24</i>  | ENSG00000122779 | NM_015905    | Transcriptional coactivator                   | [217]     |
| <i>Trim28</i>  | ENSG00000130726 | NM_005762.2  | Self-renewal                                  | [28]      |
| <i>Utf1</i>    | ENSG00000171794 | NM_003577    | Transcriptional regulator                     | [218,219] |
| <i>Wdr18</i>   | ENSG00000065268 | NM_024100    | Cofactors                                     | [220]     |
| <i>Wdr5</i>    | ENSG00000196363 | NM_017588    | Trithorax group                               | [221]     |
| <i>Wnt2b</i>   | ENSG00000134245 | NM_004185    | Wnt signaling                                 | [222]     |
| <i>Wnt8a</i>   | ENSG00000061492 | NM_058244    | Wnt signaling                                 | [223]     |
| <i>Xpo7</i>    | ENSG00000130227 | NM_001100161 | Nuclear export mediator                       | [28]      |
| <i>Yy1</i>     | ENSG00000100811 | NM_003403    | INO80 complex                                 | [27]      |
| <i>Zfhx3</i>   | ENSG00000140836 | NM_001164766 | Transcription regulator                       | [224,225] |
| <i>Zfp41</i>   | ENSG00000181638 | NM_173832    | ESC identity                                  | [70]      |
| <i>Zfp42</i>   | ENSG00000179059 | NM_174900    | Trophoblast/Preimplantation/ES Cell Repressor | [226]     |
| <i>Zfx</i>     | ENSG00000005889 | NM_003410    | Self-renewal                                  | [28]      |
| <i>Zic2</i>    | ENSG00000043355 | NM_007129    | Transcription Regulator                       | [227]     |
| <i>Zic3</i>    | ENSG00000156925 | NM_003413    | ESC identity                                  | [228]     |
| <i>Zic5</i>    | ENSG00000139800 | NM_033132    | Developmental regulator                       | [229]     |
| <i>Znf143</i>  | ENSG00000166478 | NM_003442    | ESC identity                                  | [27]      |
| <i>Znf219</i>  | ENSG00000165804 | NM_001101672 | Transcription regulator                       | [111]     |
| <i>Znf281</i>  | ENSG00000162702 | NM_012482    | Transcription Regulator                       | [230]     |
| <i>Zscan10</i> | ENSG00000130182 | NM_032805    | ESC identity                                  | [27]      |

## REFERENCES

1. Skottman H, Mikkola M, Lundin K, Olsson C, Stromberg AM, et al. (2005) Gene expression signatures of seven individual human embryonic stem cell lines. *Stem Cells* 23: 1343-56.
2. Kosaki R, Gebbia M, Kosaki K, Lewin M, Bowers P, et al. (1999) Left-right axis malformations associated with mutations in ACVR2B, the gene for human activin receptor type IIB. *American journal of medical genetics* 82: 70-6.
3. Rust W, Balakrishnan T, Zweigerdt R (2009) Cardiomyocyte enrichment from human embryonic stem cell cultures by selection of ALCAM surface expression. *Regenerative medicine* 4: 225-37.
4. Ohneda O, Ohneda K, Arai F, Lee J, Miyamoto T, et al. (2001) ALCAM (CD166): its role in hematopoietic and endothelial development. *Blood* 98: 2134-42.
5. Yan Z, Wang Z, Sharova L, Sharov AA, Ling C, et al. (2008) BAF250B-associated SWI/SNF chromatin-remodeling complex is required to maintain undifferentiated mouse embryonic stem cells. *Stem Cells* 26: 1155-65.
6. Wilson MD, Wang D, Wagner R, Breysens H, Gertsenstein M, et al. (2008) ARS2 is a conserved eukaryotic gene essential for early mammalian development. *Molecular and Cellular Biology* 28: 1503-14.
7. Andreu-Agullo C, Maurin T, Thompson CB, Lai EC (2012) Ars2 maintains neural stem-cell identity through direct transcriptional activation of Sox2. *Nature* 481: 195-8.
8. Rampalli S, Li L, Mak E, Ge K, Brand M, et al. (2007) p38 MAPK signaling regulates recruitment of Ash2L-containing methyltransferase complexes to specific genes during differentiation. *Nat Struct Mol Biol* 14: 1150-6.
9. ten Berge D, Koole W, Fuerer C, Fish M, Eroglu E, et al. (2008) Wnt signaling mediates self-organization and axis formation in embryoid bodies. *Cell Stem Cell* 3: 508-18.
10. Ding X, Lin Q, Ensenat-Waser R, Rose-John S, Zenke M (2012) Polycomb group protein Bmi1 promotes hematopoietic cell development from embryonic stem cells. *Stem cells and development* 21: 121-32.
11. Adewumi O, Aflatoonian B, Ahrlund-Richter L, Amit M, Andrews PW, et al. (2007) Characterization of human embryonic stem cell lines by the International Stem Cell Initiative. *Nature Biotechnology* 25: 803-16.
12. Assou S, Cerecedo D, Tondeur S, Pantesco V, Hovatta O, et al. (2009) A gene expression signature shared by human mature oocytes and embryonic stem cells. *BMC Genomics* 10: 10.
13. Kapinas K, Grandy R, Ghule P, Medina R, Becker K, et al. (2012) The Abbreviated Pluripotent Cell Cycle. *Journal of cellular physiology*.
14. Ruiz S, Panopoulos AD, Herrerias A, Bissig KD, Lutz M, et al. (2011) A high proliferation rate is required for cell reprogramming and maintenance of human embryonic stem cell identity. *Curr Biol* 21: 45-52.

15. Tetzlaff MT, Bai C, Finegold M, Wilson J, Harper JW, et al. (2004) Cyclin F disruption compromises placental development and affects normal cell cycle execution. *Molecular and Cellular Biology* 24: 2487-98.
16. Jiang W, Sui X, Zhang D, Liu M, Ding M, et al. (2011) CD24: a novel surface marker for PDX1-positive pancreatic progenitors derived from human embryonic stem cells. *Stem Cells* 29: 609-17.
17. Haegel H, Dierich A, Ceredig R (1994) CD44 in differentiated embryonic stem cells: surface expression and transcripts encoding multiple variants. *Dev Immunol* 3: 239-46.
18. Kolle G, Ho M, Zhou Q, Chy HS, Krishnan K, et al. (2009) Identification of human embryonic stem cell surface markers by combined membrane-polysome translation state array analysis and immunotranscriptional profiling. *Stem Cells* 27: 2446-56.
19. Menchon C, Edel MJ, Izpisua Belmonte JC (2011) The cell cycle inhibitor p27Kip(1) controls self-renewal and pluripotency of human embryonic stem cells by regulating the cell cycle, Brachyury and Twist. *Cell Cycle* 10: 1435-47.
20. Caron C, Pivot-Pajot C, van Grunsven LA, Col E, Lestrat C, et al. (2003) Cdy1: a new transcriptional co-repressor. *EMBO Rep* 4: 877-82.
21. Gaspar-Maia A, Alajem A, Polesso F, Sridharan R, Mason MJ, et al. (2009) Chd1 regulates open chromatin and pluripotency of embryonic stem cells. *Nature* 460: 863-8.
22. Bajpai R, Chen DA, Rada-Iglesias A, Zhang J, Xiong Y, et al. (2010) CHD7 cooperates with PBAF to control multipotent neural crest formation. *Nature* 463: 958-62.
23. Schnetz MP, Handoko L, Akhtar-Zaidi B, Bartels CF, Pereira CF, et al. (2010) CHD7 targets active gene enhancer elements to modulate ES cell-specific gene expression. *PLoS Genet* 6: e1001023.
24. Shaughnessy J (2005) Amplification and overexpression of CKS1B at chromosome band 1q21 is associated with reduced levels of p27Kip1 and an aggressive clinical course in multiple myeloma. *Hematology* 10 Suppl 1: 117-26.
25. Richards M, Tan SP, Tan JH, Chan WK, Bongso A (2004) The transcriptome profile of human embryonic stem cells as defined by SAGE. *Stem Cells* 22: 51-64.
26. Zheng X, Dumitru R, Lackford BL, Freudenberg JM, Singh AP, et al. (2012) Cnot1, Cnot2, and Cnot3 Maintain Mouse and Human ESC Identity and Inhibit Extraembryonic Differentiation. *Stem Cells* 30: 910-22.
27. Chia N-Y, Chan Y-S, Feng B, Lu X, Orlov YL, et al. (2010) A genome-wide RNAi screen reveals determinants of human embryonic stem cell identity. *Nature* 468: 316-20.
28. Hu G, Kim J, Xu Q, Leng Y, Orkin SH, et al. (2009) A genome-wide RNAi screen identifies a new transcriptional module required for self-renewal. *Genes & Development* 23: 837-48.

29. Lane MA, Xu J, Wilen EW, Sylvester R, Derguini F, et al. (2008) LIF removal increases CRABPI and CRABPII transcripts in embryonic stem cells cultured in retinol or 4-oxoretinol. *Mol Cell Endocrinol* 280: 63-74.
30. Maldonado-Saldivia J, van den Bergen J, Krouskos M, Gilchrist M, Lee C, et al. (2007) Dppa2 and Dppa4 are closely linked SAP motif genes restricted to pluripotent cells and the germ line. *Stem Cells* 25: 19-28.
31. Bortvin A, Goodheart M, Liao M, Page DC (2004) Dppa3 / Pgc7 / stella is a maternal factor and is not required for germ cell specification in mice. *BMC developmental biology* 4: 2.
32. Bowles J, Teasdale RP, James K, Koopman P (2003) Dppa3 is a marker of pluripotency and has a human homologue that is expressed in germ cell tumours. *Cytogenet Genome Res* 101: 261-5.
33. Kim SK, Suh MR, Yoon HS, Lee JB, Oh SK, et al. (2005) Identification of developmental pluripotency associated 5 expression in human pluripotent stem cells. *Stem Cells* 23: 458-62.
34. Takahashi YH, Westfield GH, Oleskie AN, Trievel RC, Shilatifard A, et al. (2011) Structural analysis of the core COMPASS family of histone H3K4 methylases from yeast to human. *Proceedings of the National Academy of Sciences of the United States of America* 108: 20526-31.
35. Jiang H, Shukla A, Wang X, Chen WY, Bernstein BE, et al. (2011) Role for Dpy-30 in ES cell-fate specification by regulation of H3K4 methylation within bivalent domains. *Cell* 144: 513-25.
36. Yeo HC, Beh TT, Quek JJ, Koh G, Chan KK, et al. (2011) Integrated transcriptome and binding sites analysis implicates E2F in the regulation of self-renewal in human pluripotent stem cells. *PLoS One* 6: e27231.
37. Boyer LA, Plath K, Zeitlinger J, Brambrink T, Medeiros LA, et al. (2006) Polycomb complexes repress developmental regulators in murine embryonic stem cells. *Nature* 441: 349-53.
38. Feldman N, Gerson A, Fang J, Li E, Zhang Y, et al. (2006) G9a-mediated irreversible epigenetic inactivation of Oct-3/4 during early embryogenesis. *Nature Cell Biology* 8: 188-94.
39. Takahashi K, Mitsui K, Yamanaka S (2003) Role of ERas in promoting tumour-like properties in mouse embryonic stem cells. *Nature* 423: 541-5.
40. Zhang X, Zhang J, Wang T, Esteban MA, Pei D (2008) Esrrb activates Oct4 transcription and sustains self-renewal and pluripotency in embryonic stem cells. *The Journal of biological chemistry* 283: 35825-33.
41. Feng B, Jiang J, Kraus P, Ng JH, Heng JC, et al. (2009) Reprogramming of fibroblasts into induced pluripotent stem cells with orphan nuclear receptor Esrrb. *Nature Cell Biology* 11: 197-203.

42. Moller E, Stenman G, Mandahl N, Hamberg H, Molne L, et al. (2008) POU5F1, encoding a key regulator of stem cell pluripotency, is fused to EWSR1 in hidradenoma of the skin and mucoepidermoid carcinoma of the salivary glands. *J Pathol* 215: 78-86.
43. Shen X, Liu Y, Hsu YJ, Fujiwara Y, Kim J, et al. (2008) EZH1 mediates methylation on histone H3 lysine 27 and complements EZH2 in maintaining stem cell identity and executing pluripotency. *Mol Cell* 32: 491-502.
44. Shin DM, Liu R, Wu W, Waigel SJ, Zacharias W, et al. (2012) Global Gene Expression Analysis of Very Small Embryonic-Like Stem Cells Reveals that the Ezh2-Dependent Bivalent Domain Mechanism Contributes to Their Pluripotent State. *Stem cells and development*. 21(10):1639-52.
45. Okita K, Ichisaka T, Yamanaka S (2007) Generation of germline-competent induced pluripotent stem cells. *Nature* 448: 313-7.
46. Nishimoto S, Nishida E (2007) Fibroblast growth factor 13 is essential for neural differentiation in *Xenopus* early embryonic development. *The Journal of biological chemistry* 282: 24255-61.
47. Kunath T, Saba-El-Leil MK, Almousaillekh M, Wray J, Meloche S, et al. (2007) FGF stimulation of the Erk1/2 signalling cascade triggers transition of pluripotent embryonic stem cells from self-renewal to lineage commitment. *Development* 134: 2895-902.
48. Rappold I, Ziegler BL, Kohler I, Marchetto S, Rosnet O, et al. (1997) Functional and phenotypic characterization of cord blood and bone marrow subsets expressing FLT3 (CD135) receptor tyrosine kinase. *Blood* 90: 111-25.
49. Pan G, Li J, Zhou Y, Zheng H, Pei D (2006) A negative feedback loop of transcription factors that controls stem cell pluripotency and self-renewal. *FASEB journal : official publication of the Federation of American Societies for Experimental Biology* 20: 1730-2.
50. Yoon SJ, Wills AE, Chuong E, Gupta R, Baker JC (2011) HEB and E2A function as SMAD/FOXH1 cofactors. *Genes & Development* 25: 1654-61.
51. Kudo T, Kaneko M, Iwasaki H, Togayachi A, Nishihara S, et al. (2004) Normal embryonic and germ cell development in mice lacking alpha 1,3-fucosyltransferase IX (Fut9) which show disappearance of stage-specific embryonic antigen 1. *Molecular and Cellular Biology* 24: 4221-8.
52. Adewumi O, Aflatoonian B, Ahrlund-Richter L, Amit M, Andrews PW, et al. (2007) Characterization of human embryonic stem cell lines by the International Stem Cell Initiative. *Nature Biotechnology* 25: 803-16.
53. Chapman G, Remiszewski JL, Webb GC, Schulz TC, Bottema CD, et al. (1997) The mouse homeobox gene, *Gbx2*: genomic organization and expression in pluripotent cells in vitro and in vivo. *Genomics* 46: 223-33.
54. Clark AT, Rodriguez RT, Bodnar MS, Abeyta MJ, Cedars MI, et al. (2004) Human STELLAR, NANOG, and GDF3 genes are expressed in pluripotent cells and map to chromosome 12p13, a hotspot for teratocarcinoma. *Stem Cells* 22: 169-79.

55. Player A, Wang Y, Bhattacharya B, Rao M, Puri RK, et al. (2006) Comparisons between transcriptional regulation and RNA expression in human embryonic stem cell lines. *Stem cells and development* 15: 315-23.
56. Wu SM, Choo AB, Yap MG, Chan KK (2010) Role of Sonic hedgehog signaling and the expression of its components in human embryonic stem cells. *Stem Cell Res* 4: 38-49.
57. Maekawa M, Yamaguchi K, Nakamura T, Shibukawa R, Kodanaka I, et al. (2011) Direct reprogramming of somatic cells is promoted by maternal transcription factor Glis1. *Nature* 474: 225-9.
58. Beekman C, Nichane M, De Clercq S, Maetens M, Floss T, et al. (2006) Evolutionarily conserved role of nucleostemin: controlling proliferation of stem/progenitor cells during early vertebrate development. *Molecular and Cellular Biology* 26: 9291-301.
59. Tsai NP, Bi J, Wei LN (2007) The adaptor Grb7 links netrin-1 signaling to regulation of mRNA translation. *Embo J* 26: 1522-31.
60. Thommes K, Lennartsson J, Carlberg M, Ronnstrand L (1999) Identification of Tyr-703 and Tyr-936 as the primary association sites for Grb2 and Grb7 in the c-Kit/stem cell factor receptor. *Biochem J* 341 ( Pt 1): 211-6.
61. Vassena R, Boue S, Gonzalez-Roca E, Aran B, Auer H, et al. (2011) Waves of early transcriptional activation and pluripotency program initiation during human preimplantation development. *Development* 138: 3699-709.
62. Choudhary M, Zhang X, Stojkovic P, Hyslop L, Anyfantis G, et al. (2007) Putative role of hyaluronan and its related genes, HAS2 and RHAMM, in human early preimplantation embryogenesis and embryonic stem cell characterization. *Stem Cells* 25: 3045-57.
63. Dejosez M, Levine SS, Frampton GM, Whyte WA, Stratton SA, et al. (2010) Ronin/Hcf-1 binds to a hyperconserved enhancer element and regulates genes involved in the growth of embryonic stem cells. *Genes & Development* 24: 1479-84.
64. Palmer RD, Barbosa-Morais NL, Gooding EL, Muralidhar B, Thornton CM, et al. (2008) Pediatric malignant germ cell tumors show characteristic transcriptome profiles. *Cancer Res* 68: 4239-47.
65. Webb GC, Thomas PQ, Ford JH, Rathjen PD (1993) Hesx1, a homeobox gene expressed by murine embryonic stem cells, maps to mouse chromosome 14, bands A3-B. *Genomics* 18: 464-6.
66. Held T, Barakat AZ, Mohamed BA, Paprotta I, Meinhardt A, et al. (2011) Heat-shock protein HSPA4 is required for progression of spermatogenesis. *Reproduction* 142: 133-44.
67. Arrigo AP (2005) In search of the molecular mechanism by which small stress proteins counteract apoptosis during cellular differentiation. *J Cell Biochem* 94: 241-6.

68. Sekkai D, Gruel G, Herry M, Moucadel V, Constantinescu SN, et al. (2005) Microarray analysis of LIF/Stat3 transcriptional targets in embryonic stem cells. *Stem Cells* 23: 1634-42.
69. Zhu H, Shah S, Shyh-Chang N, Shinoda G, Einhorn WS, et al. (2010) Lin28a transgenic mice manifest size and puberty phenotypes identified in human genetic association studies. *Nature Genetics* 42: 626-30.
70. Tang F, Barbacioru C, Bao S, Lee C, Nordman E, et al. (2010) Tracing the derivation of embryonic stem cells from the inner cell mass by single-cell RNA-Seq analysis. *Cell Stem Cell* 6: 468-78.
71. Cariati M, Naderi A, Brown JP, Smalley MJ, Pinder SE, et al. (2008) Alpha-6 integrin is necessary for the tumorigenicity of a stem cell-like subpopulation within the MCF7 breast cancer cell line. *Int J Cancer* 122: 298-304.
72. Buageaw A, Sukhwani M, Ben-Yehudah A, Ehmcke J, Rawe VY, et al. (2005) GDNF family receptor alpha1 phenotype of spermatogonial stem cells in immature mouse testes. *Biology of Reproduction* 73: 1011-6.
73. Zhang Z, Jones A, Sun CW, Li C, Chang CW, et al. (2011) PRC2 complexes with JARID2, MTF2, and esPRC2p48 in ES cells to modulate ES cell pluripotency and somatic cell reprogramming. *Stem Cells* 29: 229-40.
74. Candau R, Moore PA, Wang L, Barlev N, Ying CY, et al. (1996) Identification of human proteins functionally conserved with the yeast putative adaptors ADA2 and GCN5. *Molecular and Cellular Biology* 16: 593-602.
75. Herrera JE, Bergel M, Yang XJ, Nakatani Y, Bustin M (1997) The histone acetyltransferase activity of human GCN5 and PCAF is stabilized by coenzymes. *The Journal of biological chemistry* 272: 27253-8.
76. Putnik J, Zhang CD, Archangelo LF, Tizazu B, Bartels S, et al. (2007) The interaction of ETV6 (TEL) and TIP60 requires a functional histone acetyltransferase domain in TIP60. *Biochim Biophys Acta* 1772: 1211-24.
77. Fazio TG, Huff JT, Panning B (2008) An RNAi screen of chromatin proteins identifies Tip60-p400 as a regulator of embryonic stem cell identity. *Cell* 134: 162-74.
78. Pelletier N, Champagne N, Stifani S, Yang XJ (2002) MOZ and MORF histone acetyltransferases interact with the Runt-domain transcription factor Runx2. *Oncogene* 21: 2729-40.
79. Yang XJ, Ullah M (2007) MOZ and MORF, two large MYSTic HATs in normal and cancer stem cells. *Oncogene* 26: 5408-19.
80. Adamo A, Sese B, Boue S, Castano J, Paramonov I, et al. (2011) LSD1 regulates the balance between self-renewal and differentiation in human embryonic stem cells. *Nature Cell Biology* 13: 652-9.

81. Ko SY, Kang HY, Lee HS, Han SY, Hong SH (2006) Identification of Jmjd1a as a STAT3 downstream gene in mES cells. *Cell Struct Funct* 31: 53-62.
82. Loh YH, Zhang W, Chen X, George J, Ng HH (2007) Jmjd1a and Jmjd2c histone H3 Lys 9 demethylases regulate self-renewal in embryonic stem cells. *Genes & Development* 21: 2545-57.
83. Katoh Y, Katoh M (2007) Comparative integromics on JMJD2A, JMJD2B and JMJD2C: preferential expression of JMJD2C in undifferentiated ES cells. *Int J Mol Med* 20: 269-73.
84. Dey BK, Stalker L, Schnerch A, Bhatia M, Taylor-Papadimitriou J, et al. (2008) The histone demethylase KDM5b/JARID1b plays a role in cell fate decisions by blocking terminal differentiation. *Molecular and Cellular Biology* 28: 5312-27.
85. Xie L, Pelz C, Wang W, Bashar A, Varlamova O, et al. (2011) KDM5B regulates embryonic stem cell self-renewal and represses cryptic intragenic transcription. *Embo J* 30: 1473-84.
86. Nadin BM, Goodell MA, Hirschi KK (2003) Phenotype and hematopoietic potential of side population cells throughout embryonic development. *Blood* 102: 2436-43.
87. Feng H, Sandlow JI, Sandra A (1997) Expression and function of the c-kit proto-oncogene protein in mouse sperm. *Biology of Reproduction* 57: 194-203.
88. Geissler EN, Liao M, Brook JD, Martin FH, Zsebo KM, et al. (1991) Stem cell factor (SCF), a novel hematopoietic growth factor and ligand for c-kit tyrosine kinase receptor, maps on human chromosome 12 between 12q14.3 and 12qter. *Somat Cell Mol Genet* 17: 207-14.
89. Roth C, Schuierer M, Gunther K, Buettner R (2000) Genomic structure and DNA binding properties of the human zinc finger transcriptional repressor AP-2rep (KLF12). *Genomics* 63: 384-90.
90. Jiang J, Chan YS, Loh YH, Cai J, Tong GQ, et al. (2008) A core Klf circuitry regulates self-renewal of embryonic stem cells. *Nature Cell Biology* 10: 353-60.
91. Hall J, Guo G, Wray J, Eyres I, Nichols J, et al. (2009) Oct4 and LIF/Stat3 additively induce Kruppel factors to sustain embryonic stem cell self-renewal. *Cell Stem Cell* 5: 597-609.
92. Ema M, Mori D, Niwa H, Hasegawa Y, Yamanaka Y, et al. (2008) Kruppel-like factor 5 is essential for blastocyst development and the normal self-renewal of mouse ESCs. *Cell Stem Cell* 3: 555-67.
93. Lin SC, Wani MA, Whitsett JA, Wells JM (2010) Klf5 regulates lineage formation in the pre-implantation mouse embryo. *Development* 137: 3953-63.
94. Wong RC, Ibrahim A, Fong H, Thompson N, Lock LF, et al. (2011) L1TD1 is a marker for undifferentiated human embryonic stem cells. *PLoS One* 6: e19355.



95. Narva E, Rahkonen N, Emani MR, Lund R, Pursiheimo JP, et al. (2012) RNA-binding protein L1TD1 interacts with LIN28 via RNA and is required for human embryonic stem cell self-renewal and cancer cell proliferation. *Stem Cells* 30: 452-60.
96. Mesnard D, Guzman-Ayala M, Constam DB (2006) Nodal specifies embryonic visceral endoderm and sustains pluripotent cells in the epiblast before overt axial patterning. *Development* 133: 2497-505.
97. Barroso-delJesus A, Lucena-Aguilar G, Sanchez L, Ligeró G, Gutierrez-Aranda I, et al. (2011) The Nodal inhibitor Lefty is negatively modulated by the microRNA miR-302 in human embryonic stem cells. *FASEB journal : official publication of the Federation of American Societies for Experimental Biology* 25: 1497-508.
98. Smith JR, Vallier L, Lupo G, Alexander M, Harris WA, et al. (2008) Inhibition of Activin/Nodal signaling promotes specification of human embryonic stem cells into neuroectoderm. *Developmental biology* 313: 107-17.
99. Yu J, Vodyanik MA, Smuga-Otto K, Antosiewicz-Bourget J, Frane JL, et al. (2007) Induced pluripotent stem cell lines derived from human somatic cells. *Science* 318: 1917-20.
100. Lu L, Katsaros D, Shaverdashvili K, Qian B, Wu Y, et al. (2009) Pluripotent factor lin-28 and its homologue lin-28b in epithelial ovarian cancer and their associations with disease outcomes and expression of let-7a and IGF-II. *Eur J Cancer* 45: 2212-8.
101. Cotterman R, Knoepfler PS (2009) N-Myc regulates expression of pluripotency genes in neuroblastoma including *lif*, *klf2*, *klf4*, and *lin28b*. *PLoS One* 4: e5799.
102. Bresson-Mazet C, Gandrillon O, Gonin-Giraud S (2008) Stem cell antigen 2: a new gene involved in the self-renewal of erythroid progenitors. *Cell proliferation* 41: 726-38.
103. Blackwood EM, Luscher B, Eisenman RN (1992) Myc and Max associate in vivo. *Genes & Development* 6: 71-80.
104. Amati B, Brooks MW, Levy N, Littlewood TD, Evan GI, et al. (1993) Oncogenic activity of the c-Myc protein requires dimerization with Max. *Cell* 72: 233-45.
105. Maslov AY, Bailey KJ, Mielnicki LM, Freeland AL, Sun X, et al. (2007) Stem/progenitor cell-specific enhanced green fluorescent protein expression driven by the endogenous Mcm2 promoter. *Stem Cells* 25: 132-8.
106. Lin W, Zhang J, Liu X, Fei Z, Li X, et al. (2009) RNAi-mediated inhibition of MSP58 decreases tumour growth, migration and invasion in a human glioma cell line. *J Cell Mol Med* 13: 4608-22.
107. Sumitomo A, Ishino R, Urahama N, Inoue K, Yonezawa K, et al. (2010) The transcriptional mediator subunit MED1/TRAP220 in stromal cells is involved in hematopoietic stem/progenitor cell support through osteopontin expression. *Molecular and Cellular Biology* 30: 4818-27.

108. Kagey MH, Newman JJ, Bilodeau S, Zhan Y, Orlando DA, et al. (2010) Mediator and cohesin connect gene expression and chromatin architecture. *Nature* 467: 430-5.
109. Lin X, Rinaldo L, Fazly AF, Xu X (2007) Depletion of Med10 enhances Wnt and suppresses Nodal signaling during zebrafish embryogenesis. *Developmental biology* 303: 536-48.
110. Tutter AV, Kowalski MP, Baltus GA, Iourgenko V, Labow M, et al. (2009) Role for Med12 in regulation of Nanog and Nanog target genes. *The Journal of biological chemistry* 284: 3709-18.
111. van den Berg DLC, Snoek T, Mullin NP, Yates A, Bezstarosti K, et al. (2010) An Oct4-Centered Protein Interaction Network in Embryonic Stem Cells. *Cell Stem Cell* 6: 369-81.
112. Cao F, Chen Y, Cierpicki T, Liu Y, Basrur V, et al. (2010) An Ash2L/RbBP5 heterodimer stimulates the MLL1 methyltransferase activity through coordinated substrate interactions with the MLL1 SET domain. *PLoS One* 5: e14102.
113. Wysocka J, Swigut T, Milne TA, Dou Y, Zhang X, et al. (2005) WDR5 associates with histone H3 methylated at K4 and is essential for H3 K4 methylation and vertebrate development. *Cell* 121: 859-72.
114. Dou Y, Milne TA, Tackett AJ, Smith ER, Fukuda A, et al. (2005) Physical association and coordinate function of the H3 K4 methyltransferase MLL1 and the H4 K16 acetyltransferase MOF. *Cell* 121: 873-85.
115. Lubitz S, Glaser S, Schaft J, Stewart AF, Anastassiadis K (2007) Increased apoptosis and skewed differentiation in mouse embryonic stem cells lacking the histone methyltransferase Mll2. *Mol Biol Cell* 18: 2356-66.
116. Huntsman DG, Chin SF, Muleris M, Batley SJ, Collins VP, et al. (1999) MLL2, the second human homolog of the *Drosophila* trithorax gene, maps to 19q13.1 and is amplified in solid tumor cell lines. *Oncogene* 18: 7975-84.
117. Ruault M, Brun ME, Ventura M, Roizes G, De Sario A (2002) MLL3, a new human member of the TRX/MLL gene family, maps to 7q36, a chromosome region frequently deleted in myeloid leukaemia. *Gene* 284: 73-81.
118. Chauhan C, Zraly CB, Parilla M, Diaz MO, Dingwall AK (2012) Histone recognition and nuclear receptor co-activator functions of *Drosophila* Cara Mitad, a homolog of the N-terminal portion of mammalian MLL2 and MLL3. *Development* 139: 1997-2008.
119. Emerling BM, Bonifas J, Kratz CP, Donovan S, Taylor BR, et al. (2002) MLL5, a homolog of *Drosophila* trithorax located within a segment of chromosome band 7q22 implicated in myeloid leukemia. *Oncogene* 21: 4849-54.
120. Deng LW, Chiu I, Strominger JL (2004) MLL 5 protein forms intranuclear foci, and overexpression inhibits cell cycle progression. *Proceedings of the National Academy of Sciences of the United States of America* 101: 757-62.

121. Ye F, Zhou C, Cheng Q, Shen J, Chen H (2008) Stem-cell-abundant proteins Nanog, Nucleostemin and Musashi1 are highly expressed in malignant cervical epithelial cells. *BMC Cancer* 8: 108.
122. Kawahara H, Okada Y, Imai T, Iwanami A, Mischel PS, et al. (2011) Musashi1 cooperates in abnormal cell lineage protein 28 (Lin28)-mediated let-7 family microRNA biogenesis in early neural differentiation. *The Journal of biological chemistry* 286: 16121-30.
123. Liang J, Wan M, Zhang Y, Gu P, Xin H, et al. (2008) Nanog and Oct4 associate with unique transcriptional repression complexes in embryonic stem cells. *Nature Cell Biology* 10: 731-9.
124. Ghanta KS, Li DQ, Eswaran J, Kumar R (2011) Gene profiling of MTA1 identifies novel gene targets and functions. *PLoS One* 6: e17135.
125. Foygel K, Choi B, Jun S, Leong DE, Lee A, et al. (2008) A novel and critical role for Oct4 as a regulator of the maternal-embryonic transition. *PLoS One* 3: e4109.
126. Krajcinovic M, Lemieux-Blanchard E, Chiasson S, Primeau M, Costea I, et al. (2004) Role of polymorphisms in MTHFR and MTHFD1 genes in the outcome of childhood acute lymphoblastic leukemia. *Pharmacogenomics J* 4: 66-72.
127. Lorvellec M, Dumon S, Maya-Mendoza A, Jackson D, Frampton J, et al. (2010) B-Myb is critical for proper DNA duplication during an unperturbed S phase in mouse embryonic stem cells. *Stem Cells* 28: 1751-9.
128. Cartwright P, McLean C, Sheppard A, Rivett D, Jones K, et al. (2005) LIF/STAT3 controls ES cell self-renewal and pluripotency by a Myc-dependent mechanism. *Development* 132: 885-96.
129. Takahashi K, Yamanaka S (2006) Induction of pluripotent stem cells from mouse embryonic and adult fibroblast cultures by defined factors. *Cell* 126: 663-76.
130. Varlakhanova NV, Cotterman RF, deVries WN, Morgan J, Donahue LR, et al. (2010) myc maintains embryonic stem cell pluripotency and self-renewal. *Differentiation* 80: 9-19.
131. Jinawath N, Vasoontara C, Yap KL, Thiaville MM, Nakayama K, et al. (2009) NAC-1, a potential stem cell pluripotency factor, contributes to paclitaxel resistance in ovarian cancer through inactivating Gadd45 pathway. *Oncogene* 28: 1941-8.
132. Mitsui K, Tokuzawa Y, Itoh H, Segawa K, Murakami M, et al. (2003) The homeoprotein Nanog is required for maintenance of pluripotency in mouse epiblast and ES cells. *Cell* 113: 631-42.
133. Chambers I, Colby D, Robertson M, Nichols J, Lee S, et al. (2003) Functional expression cloning of Nanog, a pluripotency sustaining factor in embryonic stem cells. *Cell* 113: 643-55.

134. Kopranner M, Thisse C, Thisse B, Raz E (2001) A zebrafish nanos-related gene is essential for the development of primordial germ cells. *Genes & Development* 15: 2877-85.
135. Young HE, Steele TA, Bray RA, Detmer K, Blake LW, et al. (1999) Human pluripotent and progenitor cells display cell surface cluster differentiation markers CD10, CD13, CD56, and MHC class-I. *Proc Soc Exp Biol Med* 221: 63-71.
136. Voegel JJ, Heine MJ, Tini M, Vivat V, Chambon P, et al. (1998) The coactivator TIF2 contains three nuclear receptor-binding motifs and mediates transactivation through CBP binding-dependent and -independent pathways. *Embo J* 17: 507-19.
137. James D, Levine AJ, Besser D, Hemmati-Brivanlou A (2005) TGFbeta/activin/nodal signaling is necessary for the maintenance of pluripotency in human embryonic stem cells. *Development* 132: 1273-82.
138. Vallier L, Alexander M, Pedersen RA (2005) Activin/Nodal and FGF pathways cooperate to maintain pluripotency of human embryonic stem cells. *J Cell Sci* 118: 4495-509.
139. Abdelalim EM, Tooyama I (2011) NPR-A regulates self-renewal and pluripotency of embryonic stem cells. *Cell Death Dis* 2: e127.
140. Niakan KK, Davis EC, Clipsham RC, Jiang M, Dehart DB, et al. (2006) Novel role for the orphan nuclear receptor Dax1 in embryogenesis, different from steroidogenesis. *Mol Genet Metab* 88: 261-71.
141. Sun C, Nakatake Y, Akagi T, Ura H, Matsuda T, et al. (2009) Dax1 binds to Oct3/4 and inhibits its transcriptional activity in embryonic stem cells. *Molecular and Cellular Biology* 29: 4574-83.
142. Gu P, LeMenuet D, Chung AC, Mancini M, Wheeler DA, et al. (2005) Orphan nuclear receptor GCNF is required for the repression of pluripotency genes during retinoic acid-induced embryonic stem cell differentiation. *Molecular and Cellular Biology* 25: 8507-19.
143. Clotman F, Jacquemin P, Plumb-Rudewicz N, Pierreux CE, Van der Smissen P, et al. (2005) Control of liver cell fate decision by a gradient of TGF beta signaling modulated by Onecut transcription factors. *Genes & Development* 19: 1849-54.
144. Boyer LA, Lee TI, Cole MF, Johnstone SE, Levine SS, et al. (2005) Core transcriptional regulatory circuitry in human embryonic stem cells. *Cell* 122: 947-56.
145. Acampora D, Avantaggiato V, Tuorto F, Barone P, Perera M, et al. (1999) Differential transcriptional control as the major molecular event in generating Otx1<sup>-/-</sup> and Otx2<sup>-/-</sup> divergent phenotypes. *Development* 126: 1417-26.
146. Ding L, Paszkowski-Rogacz M, Nitzsche A, Slabicki MM, Heninger AK, et al. (2009) A genome-scale RNAi screen for Oct4 modulators defines a role of the Paf1 complex for embryonic stem cell identity. *Cell Stem Cell* 4: 403-15.

147. Chen IT, Smith ML, O'Connor PM, Fornace AJ, Jr. (1995) Direct interaction of Gadd45 with PCNA and evidence for competitive interaction of Gadd45 and p21Waf1/Cip1 with PCNA. *Oncogene* 11: 1931-7.
148. Smith ML, Chen IT, Zhan Q, Bae I, Chen CY, et al. (1994) Interaction of the p53-regulated protein Gadd45 with proliferating cell nuclear antigen. *Science* 266: 1376-80.
149. Sun Y, Li H, Liu Y, Mattson MP, Rao MS, et al. (2008) Evolutionarily conserved transcriptional co-expression guiding embryonic stem cell differentiation. *PLoS One* 3: e3406.
150. Isono K, Fujimura Y, Shinga J, Yamaki M, J OW, et al. (2005) Mammalian polyhomeotic homologues Phc2 and Phc1 act in synergy to mediate polycomb repression of Hox genes. *Molecular and Cellular Biology* 25: 6694-706.
151. Deshpande AM, Akunowicz JD, Reveles XT, Patel BB, Saria EA, et al. (2007) PHC3, a component of the hPRC-H complex, associates with E2F6 during G0 and is lost in osteosarcoma tumors. *Oncogene* 26: 1714-22.
152. Agrawal S, Koschmieder S, Baumer N, Reddy NG, Berdel WE, et al. (2008) Pim2 complements Flt3 wild-type receptor in hematopoietic progenitor cell transformation. *Leukemia : official journal of the Leukemia Society of America, Leukemia Research Fund, U.K* 22: 78-86.
153. Doyonnas R, Kershaw DB, Duhme C, Merkens H, Chelliah S, et al. (2001) Anuria, omphalocele, and perinatal lethality in mice lacking the CD34-related protein podocalyxin. *The Journal of experimental medicine* 194: 13-27.
154. Narsinh KH, Sun N, Sanchez-Freire V, Lee AS, Almeida P, et al. (2011) Single cell transcriptional profiling reveals heterogeneity of human induced pluripotent stem cells. *The Journal of clinical investigation* 121: 1217-21.
155. Nichols J, Zevnik B, Anastassiadis K, Niwa H, Klewe-Nebenius D, et al. (1998) Formation of pluripotent stem cells in the mammalian embryo depends on the POU transcription factor Oct4. *Cell* 95: 379-91.
156. Scholer HR, Hatzopoulos AK, Balling R, Suzuki N, Gruss P (1989) A family of octamer-specific proteins present during mouse embryogenesis: evidence for germline-specific expression of an Oct factor. *Embo J* 8: 2543-50.
157. Armstrong CG, Browne GJ, Cohen P, Cohen PT (1997) PPP1R6, a novel member of the family of glycogen-targeting subunits of protein phosphatase 1. *FEBS Lett* 418: 210-4.
158. Yamaji M, Seki Y, Kurimoto K, Yabuta Y, Yuasa M, et al. (2008) Critical function of Prdm14 for the establishment of the germ cell lineage in mice. *Nature Genetics* 40: 1016-22.
159. Chuikov S, Levi BP, Smith ML, Morrison SJ (2010) Prdm16 promotes stem cell maintenance in multiple tissues, partly by regulating oxidative stress. *Nature Cell Biology* 12: 999-1006.

160. Deng Q, Huang S (2004) PRDM5 is silenced in human cancers and has growth suppressive activities. *Oncogene* 23: 4903-10.
161. Lee YH, Ma H, Tan TZ, Ng SS, Soong R, et al. (2012) Protein Arginine Methyltransferase 6 Regulates Embryonic Stem Cell Identity. *Stem cells and development*. 21(14):2613-22.
162. Jozefczuk J, Stachelscheid H, Chavez L, Herwig R, Lehrach H, et al. (2010) Molecular characterization of cultured adult human liver progenitor cells. *Tissue engineering. Part C, Methods* 16: 821-34.
163. Lamprianou S, Chatzopoulou E, Thomas JL, Bouyain S, Harroch S (2011) A complex between contactin-1 and the protein tyrosine phosphatase PTPRZ controls the development of oligodendrocyte precursor cells. *Proceedings of the National Academy of Sciences of the United States of America* 108: 17498-503.
164. Spassov DS, Jurecic R (2003) Mouse Pum1 and Pum2 genes, members of the Pumilio family of RNA-binding proteins, show differential expression in fetal and adult hematopoietic stem cells and progenitors. *Blood Cells Mol Dis* 30: 55-69.
165. Nitzsche A, Paszkowski-Rogacz M, Matarese F, Janssen-Megens EM, Hubner NC, et al. (2011) RAD21 cooperates with pluripotency transcription factors in the maintenance of embryonic stem cell identity. *PLoS One* 6: e19470.
166. O'Connor MD, Wederell E, Robertson G, Delaney A, Morozova O, et al. (2011) Retinoblastoma-binding proteins 4 and 9 are important for human pluripotent stem cell maintenance. *Exp Hematol* 39: 866-79 e1.
167. Avdic V, Zhang P, Lanouette S, Voronova A, Skerjanc I, et al. (2011) Fine-tuning the stimulation of MLL1 methyltransferase activity by a histone H3-based peptide mimetic. *FASEB journal : official publication of the Federation of American Societies for Experimental Biology* 25: 960-7.
168. Yang J, Kiefer S, Rauchman M (2002) Characterization of the gene encoding mouse retinoblastoma binding protein-7, a component of chromatin-remodeling complexes. *Genomics* 80: 407-15.
169. Claudio PP, Howard CM, Baldi A, De Luca A, Fu Y, et al. (1994) p130/pRb2 has growth suppressive properties similar to yet distinctive from those of retinoblastoma family members pRb and p107. *Cancer Res* 54: 5556-60.
170. Singh SK, Kagalwala MN, Parker-Thornburg J, Adams H, Majumder S (2008) REST maintains self-renewal and pluripotency of embryonic stem cells. *Nature* 453: 223-7.
171. Adams IR, McLaren A (2004) Identification and characterisation of mRif1: a mouse telomere-associated protein highly expressed in germ cells and embryo-derived pluripotent stem cells. *Developmental dynamics : an official publication of the American Association of Anatomists* 229: 733-44.

172. Stock JK, Giadrossi S, Casanova M, Brookes E, Vidal M, et al. (2007) Ring1-mediated ubiquitination of H2A restrains poised RNA polymerase II at bivalent genes in mouse ES cells. *Nature Cell Biology* 9: 1428-35.
173. Endoh M, Endo TA, Endoh T, Fujimura Y, Ohara O, et al. (2008) Polycomb group proteins Ring1A/B are functionally linked to the core transcriptional regulatory circuitry to maintain ES cell identity. *Development* 135: 1513-24.
174. Mueller CL, Jaehning JA (2002) Ctr9, Rtf1, and Leo1 are components of the Paf1/RNA polymerase II complex. *Molecular and Cellular Biology* 22: 1971-80.
175. Karantzali E, Lekakis V, Ioannou M, Hadjimichael C, Papamatheakis J, et al. (2011) Sall1 regulates embryonic stem cell differentiation in association with nanog. *The Journal of biological chemistry* 286: 1037-45.
176. Zhang J, Tam WL, Tong GQ, Wu Q, Chan HY, et al. (2006) Sall4 modulates embryonic stem cell pluripotency and early embryonic development by the transcriptional regulation of Pou5f1. *Nature Cell Biology* 8: 1114-23.
177. Yang J, Gao C, Chai L, Ma Y (2010) A novel SALL4/OCT4 transcriptional feedback network for pluripotency of embryonic stem cells. *PLoS One* 5: e10766.
178. Yuri S, Fujimura S, Nimura K, Takeda N, Toyooka Y, et al. (2009) Sall4 is essential for stabilization, but not for pluripotency, of embryonic stem cells by repressing aberrant trophoctoderm gene expression. *Stem Cells* 27: 796-805.
179. Wu Q, Chen X, Zhang J, Loh YH, Low TY, et al. (2006) Sall4 interacts with Nanog and co-occupies Nanog genomic sites in embryonic stem cells. *The Journal of biological chemistry* 281: 24090-4.
180. Yuan P, Han J, Guo G, Orlov YL, Huss M, et al. (2009) Eset partners with Oct4 to restrict extraembryonic trophoblast lineage potential in embryonic stem cells. *Genes & Development* 23: 2507-20.
181. Bilodeau S, Kagey MH, Frampton GM, Rahl PB, Young RA (2009) SetDB1 contributes to repression of genes encoding developmental regulators and maintenance of ES cell state. *Genes & Development* 23: 2484-9.
182. Yeap LS, Hayashi K, Surani MA (2009) ERG-associated protein with SET domain (ESET)-Oct4 interaction regulates pluripotency and represses the trophoctoderm lineage. *Epigenetics Chromatin* 2: 12.
183. Kele J, Andersson ER, Villaescusa JC, Cajanek L, Parish CL, et al. (2012) SFRP1 and SFRP2 dose-dependently regulate midbrain dopamine neuron development in vivo and in embryonic stem cells. *Stem Cells* 30: 865-75.
184. Dryden SC, Nahhas FA, Nowak JE, Goustin AS, Tainsky MA (2003) Role for human SIRT2 NAD-dependent deacetylase activity in control of mitotic exit in the cell cycle. *Molecular and Cellular Biology* 23: 3173-85.

185. Zhang F, Lundin M, Ristimaki A, Heikkila P, Lundin J, et al. (2003) Ski-related novel protein N (SnoN), a negative controller of transforming growth factor-beta signaling, is a prognostic marker in estrogen receptor-positive breast carcinomas. *Cancer Res* 63: 5005-10.
186. Ying QL, Nichols J, Chambers I, Smith A (2003) BMP induction of Id proteins suppresses differentiation and sustains embryonic stem cell self-renewal in collaboration with STAT3. *Cell* 115: 281-92.
187. Beattie GM, Lopez AD, Bucay N, Hinton A, Firpo MT, et al. (2005) Activin A maintains pluripotency of human embryonic stem cells in the absence of feeder layers. *Stem Cells* 23: 489-95.
188. Kidder BL, Palmer S, Knott JG (2009) SWI/SNF-Brg1 regulates self-renewal and occupies core pluripotency-related genes in embryonic stem cells. *Stem Cells* 27: 317-28.
189. Ho L, Jothi R, Ronan JL, Cui K, Zhao K, et al. (2009) An embryonic stem cell chromatin remodeling complex, esBAF, is an essential component of the core pluripotency transcriptional network. *Proceedings of the National Academy of Sciences of the United States of America* 106: 5187-91.
190. Klochendler-Yeivin A, Fiette L, Barra J, Muchardt C, Babinet C, et al. (2000) The murine SNF5/INI1 chromatin remodeling factor is essential for embryonic development and tumor suppression. *EMBO Rep* 1: 500-6.
191. Schaniel C, Ang YS, Ratnakumar K, Cormier C, James T, et al. (2009) Smarcc1/Baf155 couples self-renewal gene repression with changes in chromatin structure in mouse embryonic stem cells. *Stem Cells* 27: 2979-91.
192. Liu J, Feldman R, Zhang Z, Deardorff MA, Haverfield EV, et al. (2009) SMC1A expression and mechanism of pathogenicity in probands with X-Linked Cornelia de Lange syndrome. *Hum Mutat* 30: 1535-42.
193. Zhu G, Mehler MF, Zhao J, Yu Yung S, Kessler JA (1999) Sonic hedgehog and BMP2 exert opposing actions on proliferation and differentiation of embryonic neural progenitor cells. *Developmental biology* 215: 118-29.
194. Cai C, Thorne J, Grabel L (2008) Hedgehog serves as a mitogen and survival factor during embryonic stem cell neurogenesis. *Stem Cells* 26: 1097-108.
195. Palmqvist L, Glover CH, Hsu L, Lu M, Bossen B, et al. (2005) Correlation of murine embryonic stem cell gene expression profiles with functional measures of pluripotency. *Stem Cells* 23: 663-80.
196. Wang Z, Oron E, Nelson B, Razis S, Ivanova N (2012) Distinct lineage specification roles for NANOG, OCT4, and SOX2 in human embryonic stem cells. *Cell Stem Cell* 10: 440-54.



197. Yang HM, Do HJ, Oh JH, Kim JH, Choi SY, et al. (2005) Characterization of putative cis-regulatory elements that control the transcriptional activity of the human Oct4 promoter. *J Cell Biochem* 96: 821-30.
198. Wu DY, Yao Z (2006) Functional analysis of two Sp1/Sp3 binding sites in murine Nanog gene promoter. *Cell research* 16: 319-22.
199. Pacini S, Carnicelli V, Trombi L, Montali M, Fazzi R, et al. (2010) Constitutive expression of pluripotency-associated genes in mesodermal progenitor cells (MPCs). *PLoS One* 5: e9861.
200. Niwa H, Burdon T, Chambers I, Smith A (1998) Self-renewal of pluripotent embryonic stem cells is mediated via activation of STAT3. *Genes & Development* 12: 2048-60.
201. Luzzani C, Solari C, Losino N, Ariel W, Romorini L, et al. (2011) Modulation of chromatin modifying factors' gene expression in embryonic and induced pluripotent stem cells. *Biochemical and biophysical research communications* 410: 816-22.
202. Lee TI, Jenner RG, Boyer LA, Guenther MG, Levine SS, et al. (2006) Control of developmental regulators by Polycomb in human embryonic stem cells. *Cell* 125: 301-13.
203. Cole MF, Johnstone SE, Newman JJ, Kagey MH, Young RA (2008) Tcf3 is an integral component of the core regulatory circuitry of embryonic stem cells. *Genes & Development* 22: 746-55.
204. Marson A, Foreman R, Chevalier B, Bilodeau S, Kahn M, et al. (2008) Wnt signaling promotes reprogramming of somatic cells to pluripotency. *Cell Stem Cell* 3: 132-5.
205. Wray J, Kalkan T, Gomez-Lopez S, Eckardt D, Cook A, et al. (2012) Inhibition of glycogen synthase kinase-3 alleviates Tcf3 repression of the pluripotency network and increases embryonic stem cell resistance to differentiation. *Nature Cell Biology* 14: 555.
206. Loh Y-H, Wu Q, Chew J-L, Vega VB, Zhang W, et al. (2006) The Oct4 and Nanog transcription network regulates pluripotency in mouse embryonic stem cells. *Nature Genetics* 38: 431-40.
207. Fu TB, Virgilio L, Narducci MG, Facchiano A, Russo G, et al. (1994) Characterization and localization of the TCL-1 oncogene product. *Cancer Res* 54: 6297-301.
208. Shen MM, Wang H, Leder P (1997) A differential display strategy identifies Cryptic, a novel EGF-related gene expressed in the axial and lateral mesoderm during mouse gastrulation. *Development* 124: 429-42.
209. Parisi S, D'Andrea D, Lago CT, Adamson ED, Persico MG, et al. (2003) Nodal-dependent Cripto signaling promotes cardiomyogenesis and redirects the neural fate of embryonic stem cells. *The Journal of cell biology* 163: 303-14.
210. Pericuesta E, Ramirez MA, Villa-Diaz A, Relano-Gines A, Torres JM, et al. (2006) The proximal promoter region of mTert is sufficient to regulate telomerase activity in ES cells and transgenic animals. *Reprod Biol Endocrinol* 4: 5.

211. Hamid R, Brandt SJ (2009) Transforming growth-interacting factor (TGIF) regulates proliferation and differentiation of human myeloid leukemia cells. *Mol Oncol* 3: 451-63.
212. Dejosez M, Krumenacker JS, Ziturski L, Passeri M, Chu LF, et al. (2008) Ronin is essential for embryogenesis and the pluripotency of mouse embryonic stem cells. *Cell* 133: 1162-74.
213. Babaie Y, Herwig R, Greber B, Brink TC, Wruck W, et al. (2007) Analysis of Oct4-dependent transcriptional networks regulating self-renewal and pluripotency in human embryonic stem cells. *Stem Cells* 25: 500-10.
214. Western P, Maldonado-Saldivia J, van den Bergen J, Hajkova P, Saitou M, et al. (2005) Analysis of Esg1 expression in pluripotent cells and the germline reveals similarities with Oct4 and Sox2 and differences between human pluripotent cell lines. *Stem Cells* 23: 1436-42.
215. Gattei V, Degan M, Gloghini A, De Liliis A, Improta S, et al. (1997) CD30 ligand is frequently expressed in human hematopoietic malignancies of myeloid and lymphoid origin. *Blood* 89: 2048-59.
216. Marshall GM, Bell JL, Koach J, Tan O, Kim P, et al. (2010) TRIM16 acts as a tumour suppressor by inhibitory effects on cytoplasmic vimentin and nuclear E2F1 in neuroblastoma cells. *Oncogene* 29: 6172-83.
217. Jain AK, Allton K, Iacovino M, Mahen E, Milczarek RJ, et al. (2012) p53 regulates cell cycle and microRNAs to promote differentiation of human embryonic stem cells. *PLoS Biol* 10: e1001268.
218. van den Boom V, Kooistra SM, Boesjes M, Geverts B, Houtsmuller AB, et al. (2007) UTF1 is a chromatin-associated protein involved in ES cell differentiation. *The Journal of cell biology* 178: 913-24.
219. Kooistra SM, Thummer RP, Eggen BJ (2009) Characterization of human UTF1, a chromatin-associated protein with repressor activity expressed in pluripotent cells. *Stem Cell Res* 2: 211-8.
220. Wang J, Rao S, Chu J, Shen X, Levasseur DN, et al. (2006) A protein interaction network for pluripotency of embryonic stem cells. *Nature* 444: 364-8.
221. Ang YS, Tsai SY, Lee DF, Monk J, Su J, et al. (2011) Wdr5 mediates self-renewal and reprogramming via the embryonic stem cell core transcriptional network. *Cell* 145: 183-97.
222. Snow GE, Kasper AC, Busch AM, Schwarz E, Ewings KE, et al. (2009) Wnt pathway reprogramming during human embryonal carcinoma differentiation and potential for therapeutic targeting. *BMC Cancer* 9: 383.
223. Bouillet P, Oulad-Abdelghani M, Ward SJ, Bronner S, Chambon P, et al. (1996) A new mouse member of the Wnt gene family, mWnt-8, is expressed during early embryogenesis and is ectopically induced by retinoic acid. *Mechanisms of Development* 58: 141-52.

224. Morinaga T, Yasuda H, Hashimoto T, Higashio K, Tamaoki T (1991) A human alpha-fetoprotein enhancer-binding protein, ATBF1, contains four homeodomains and seventeen zinc fingers. *Molecular and Cellular Biology* 11: 6041-9.
225. Kaspar P, Dvorakova M, Kralova J, Pajer P, Kozmik Z, et al. (1999) Myb-interacting protein, ATBF1, represses transcriptional activity of Myb oncoprotein. *The Journal of biological chemistry* 274: 14422-8.
226. Shi W, Wang H, Pan G, Geng Y, Guo Y, et al. (2006) Regulation of the pluripotency marker Rex-1 by Nanog and Sox2. *The Journal of biological chemistry* 281: 23319-25.
227. Brown L, Brown S (2009) Zic2 is expressed in pluripotent cells in the blastocyst and adult brain expression overlaps with makers of neurogenesis. *Gene Expr Patterns* 9: 43-9.
228. Lim LS, Hong FH, Kunarso G, Stanton LW (2010) The pluripotency regulator Zic3 is a direct activator of the Nanog promoter in ESCs. *Stem Cells* 28: 1961-9.
229. Nyholm MK, Wu SF, Dorsky RI, Grinblat Y (2007) The zebrafish zic2a-zic5 gene pair acts downstream of canonical Wnt signaling to control cell proliferation in the developing tectum. *Development* 134: 735-46.
230. Wang ZX, Teh CH, Chan CM, Chu C, Rossbach M, et al. (2008) The transcription factor Zfp281 controls embryonic stem cell pluripotency by direct activation and repression of target genes. *Stem Cells* 26: 2791-9.
