# Supplementary material for: Genome-Wide Analysis Reveals the Unique Stem Cell Identity of Human Amniocytes
Source: PubMed Central journal article supplement (PMC3542377; doi:10.1371/journal.pone.0053372), 2013-01-10
Supplement: pone.0053372.s004.pdf [file pone.0053372.s004.pdf]

**Table S3.** RNA-seq differential expression analysis. Table S3A shows transcripts identified by RNA-seq analysis [1] that were (A) consistently higher in ESC or (B) consistently higher in iPSC compared to amniocytes. Table S3B shows differential expression results that were sorted by the smallest to largest adjusted p-value. The top ten most significant genes for each comparison are listed.

**Table S3A.** Selected 15 genes consistently higher in ESC and iPSC compared to amniocytes.

| Gene                      | Function                                                                      | ESC     | iPSC    | Amniocytes |
|---------------------------|-------------------------------------------------------------------------------|---------|---------|------------|
| <b>(A) Higher in ESC</b>  |                                                                               |         |         |            |
| <i>Tcerg1l</i>            | Transcription elongation regulator 1                                          | 100.9   | 1.2     | 1.1        |
| <i>Fam19a5</i>            | Small secreted protein acting as regulator of immune and nervous cells.       | 350.6   | 1.8     | 11.9       |
| <i>Dpp6</i>               | Membrane serine protease, may play a role in brain development.               | 140.1   | 23.0    | 11.0       |
| <i>Irx2</i>               | Multiple roles during pattern formation                                       | 2500.1  | 603.3   | 38.2       |
| <i>Nnat</i>               | Neural differentiation                                                        | 907.2   | 4.4     | 165.9      |
| <i>Sox11</i>              | Neural differentiation                                                        | 18311.0 | 13583.3 | 924.3      |
| <b>(B) Higher in iPSC</b> |                                                                               |         |         |            |
| <i>Tbx15</i>              | Transcriptional regulator of the skeleton, limb, vertebral column, and head   | 8.8     | 304.9   | 38.1       |
| <i>Pitx2</i>              | Eye, tooth, abdominal organs, left-right asymmetry.                           | 22.1    | 107.5   | 104.6      |
| <i>Cr1l</i>               | Hematopoietic, lymphoid, Liver, spleen, thymus                                | 3.6     | 76.7    | 0.4        |
| <i>Ctsf</i>               | Cysteine proteinases in the lysosomal proteolytic system                      | 17.6    | 94.5    | 281.5      |
| <i>Grem1</i>              | BMP antagonist regulates organogenesis, body patterning, and differentiation. | 210.8   | 238.7   | 11889.3    |
| <i>Ly6k</i>               | Carcinoembryonic antigen                                                      | 1.1     | 2.1     | 23.8       |
| <i>Znf208</i>             | Transcriptional repression                                                    | 17.4    | 327.0   | 9.0        |
| <i>Znf560</i>             | Transcriptional regulation                                                    | 4.1     | 64.1    | 7.3        |
| <i>Znf662</i>             | Transcriptional regulation                                                    | 3.0     | 5.2     | 44.4       |

**Table S3B.** The top ten most significant genes for each comparison.

| Amniocytes vs ESC (high in ESC) |                 |           |               |           |             |                 |          |          |
|---------------------------------|-----------------|-----------|---------------|-----------|-------------|-----------------|----------|----------|
| Gene symbol                     | Ensgene id      | Base Mean | Amniocyt mean | hESC mean | Fold Change | log2Fold Change | pval     | padj     |
| <i>TDGF1</i>                    | ENSG00000241186 | 3784.3    | 0.2           | 11153.4   | 0.0         | -16.1           | 5.4E-240 | 1.6E-235 |

|                                                |                 |          |               |           |             |                 |           |           |
|------------------------------------------------|-----------------|----------|---------------|-----------|-------------|-----------------|-----------|-----------|
| <i>DPPA4</i>                                   | ENSG00000121570 | 8397.8   | 2.0           | 24747.6   | 0.0         | -13.6           | 6.9E-229  | 6.8E-225  |
| <i>ZIC3</i>                                    | ENSG00000156925 | 1282.7   | 0.1           | 3780.5    | 0.0         | -15.2           | 2.7E-209  | 2.0E-205  |
| <i>SOX2</i>                                    | ENSG00000181449 | 2431.0   | 0.8           | 7163.5    | 0.0         | -13.1           | 1.4E-208  | 8.2E-205  |
| <i>LIN28B</i>                                  | ENSG00000187772 | 1301.6   | 0.3           | 3835.6    | 0.0         | -13.6           | 1.3E-201  | 6.4E-198  |
| <i>L1TD1</i>                                   | ENSG00000240563 | 3806.7   | 3.2           | 11213.8   | 0.0         | -11.8           | 1.0E-192  | 4.3E-189  |
| <i>LIN28A</i>                                  | ENSG00000131914 | 11676.9  | 15.9          | 34385.1   | 0.0         | -11.1           | 8.2E-186  | 2.7E-182  |
| <i>PTPRZ1</i>                                  | ENSG00000106278 | 1559.7   | 2.0           | 4593.2    | 0.0         | -11.2           | 3.9E-181  | 1.2E-177  |
| <i>SLC7A3</i>                                  | ENSG00000165349 | 1945.2   | 2.8           | 5727.6    | 0.0         | -11.0           | 7.2E-177  | 1.9E-173  |
| <i>LECT1</i>                                   | ENSG00000136110 | 550.8    | 0.6           | 1622.2    | 0.0         | -11.3           | 1.2E-166  | 2.5E-163  |
| <b>Amniocytes vs ESC_(high in Amniocytes)</b>  |                 |          |               |           |             |                 |           |           |
| Gene symbol                                    | Ensgene id      | baseMean | Amniocyt mean | hESC mean | Fold Change | log2Fold Change | pval      | padj      |
| <i>NNMT</i>                                    | ENSG00000166741 | 7082.3   | 10718.5       | 1.3       | 7990.2      | 13.0            | 1.09E-106 | 4.01E-104 |
| <i>IGFBP7</i>                                  | ENSG00000163453 | 5600.8   | 8476.4        | 1.0       | 8100.9      | 13.0            | 6.08E-94  | 1.42E-91  |
| <i>PAX8</i>                                    | ENSG00000125618 | 2585.9   | 3913.4        | 0.8       | 4746.4      | 12.2            | 6.62E-94  | 1.54E-91  |
| <i>HOXA3</i>                                   | ENSG00000105997 | 580.9    | 879.2         | 0.0       | 1000000.0   | 19.9            | 1.35E-86  | 2.72E-84  |
| <i>HOXA9</i>                                   | ENSG00000078399 | 457.3    | 692.2         | 0.0       | 1000000.0   | 19.9            | 8.06E-83  | 1.40E-80  |
| <i>HOXB9</i>                                   | ENSG00000170689 | 757.9    | 1146.7        | 0.6       | 1993.2      | 11.0            | 2.87E-80  | 4.58E-78  |
| <i>HOXB6</i>                                   | ENSG00000108511 | 372.3    | 563.5         | 0.0       | 26420.0     | 14.7            | 1.63E-78  | 2.47E-76  |
| <i>ANKRD1</i>                                  | ENSG00000148677 | 11249.0  | 17016.4       | 17.9      | 952.7       | 9.9             | 5.93E-78  | 8.70E-76  |
| <i>HOXA7</i>                                   | ENSG00000122592 | 400.3    | 605.7         | 0.2       | 2599.6      | 11.3            | 4.69E-76  | 6.41E-74  |
| <i>LRRN4</i>                                   | ENSG00000125872 | 1490.0   | 2253.7        | 2.7       | 821.1       | 9.7             | 5.54E-76  | 7.49E-74  |
| <b>Amniocytes vs iPSC_(high in iPSC)</b>       |                 |          |               |           |             |                 |           |           |
| Gene symbol                                    | Ensgene id      | baseMean | Amniocyt mean | iPSC mean | Fold Change | log2Fold Change | pval      | padj      |
| <i>LIN28A</i>                                  | ENSG00000131914 | 7848.4   | 16.0          | 31998.4   | 0.0         | -11.0           | >E-306    | >E-306    |
| <i>PTPRZ1</i>                                  | ENSG00000106278 | 1053.0   | 2.0           | 4293.5    | 0.0         | -11.1           | >E-306    | >E-306    |
| <i>ADCY2</i>                                   | ENSG00000078295 | 965.4    | 1.5           | 3937.2    | 0.0         | -11.3           | >E-306    | >E-306    |
| <i>L1TD1</i>                                   | ENSG00000240563 | 2717.9   | 3.2           | 11088.1   | 0.0         | -11.8           | >E-306    | >E-306    |
| <i>DPPA4</i>                                   | ENSG00000121570 | 7298.4   | 2.0           | 29795.7   | 0.0         | -13.9           | >E-306    | >E-306    |
| <i>LIN28B</i>                                  | ENSG00000187772 | 1165.3   | 0.3           | 4757.2    | 0.0         | -13.9           | >E-306    | >E-306    |
| <i>VRTN</i>                                    | ENSG00000133980 | 543.8    | 0.1           | 2220.1    | 0.0         | -14.2           | >E-306    | >E-306    |
| <i>ZIC3</i>                                    | ENSG00000156925 | 917.5    | 0.1           | 3746.3    | 0.0         | -15.1           | >E-306    | >E-306    |
| <i>TDGF1</i>                                   | ENSG00000241186 | 3719.8   | 0.2           | 15188.7   | 0.0         | -16.5           | >E-306    | >E-306    |
| <i>ITM2A</i>                                   | ENSG00000078596 | 1254.4   | 4.0           | 5109.8    | 0.0         | -10.3           | 1.8E-306  | 4.4E-303  |
| <b>Amniocytes vs iPSC_(high in Amniocytes)</b> |                 |          |               |           |             |                 |           |           |
| Gene symbol                                    | Ensgene id      | baseMean | Amniocyt mean | iPSC mean | Fold Change | log2Fold Change | pval      | padj      |
| <i>NNMT</i>                                    | ENSG00000166741 | 8096.1   | 10721.7       | 0.3       | 38988.1     | 15.3            | 4.7E-152  | 9.5E-150  |
| <i>PAX8</i>                                    | ENSG00000125618 | 2956.8   | 3915.6        | 0.4       | 9721.0      | 13.2            | 2.1E-130  | 3.1E-128  |
| <i>MVP</i>                                     | ENSG00000013364 | 4493.7   | 5950.5        | 1.8       | 3336.2      | 11.7            | 1.3E-128  | 1.8E-126  |
| <i>HOXB9</i>                                   | ENSG00000170689 | 866.0    | 1146.8        | 0.1       | 13380.1     | 13.7            | 6.3E-109  | 5.8E-107  |

| <i>KCNS3</i>                              | ENSG00000170745 | 343.9    | 36.2        | 1292.8      | 0.0         | -5.2            | 1.4E-108 | 1.3E-106 |
|-------------------------------------------|-----------------|----------|-------------|-------------|-------------|-----------------|----------|----------|
| <i>HOXA7</i>                              | ENSG00000122592 | 457.8    | 606.3       | 0.0         | 1000000.0   | 19.9            | 2.3E-97  | 1.7E-95  |
| <i>HOXA9</i>                              | ENSG00000078399 | 523.0    | 692.6       | 0.2         | 4160.7      | 12.0            | 4.2E-97  | 3.2E-95  |
| <i>HOXA3</i>                              | ENSG00000105997 | 664.3    | 879.7       | 0.2         | 3557.3      | 11.8            | 1.7E-96  | 1.3E-94  |
| <i>BMP1</i>                               | ENSG00000168487 | 3506.7   | 4639.3      | 14.6        | 318.1       | 8.3             | 6.0E-93  | 4.1E-91  |
| <i>HOXC10</i>                             | ENSG00000180818 | 358.9    | 475.3       | 0.0         | 1000000.0   | 19.9            | 2.4E-92  | 1.6E-90  |
| <b>Gestational age (High in Early GA)</b> |                 |          |             |             |             |                 |          |          |
| Gene symbol                               | Ensgene id      | baseMean | Mean early  | Mean late   | Fold Change | log2Fold Change | pval     | padj     |
| <i>IGF2BP1</i>                            | ENSG00000159217 | 1190.8   | 1832.1      | 514.0       | 3.6         | 1.8             | 8.6E-14  | 1.2E-10  |
| <i>Tbx18</i>                              | ENSG00000112837 | 55.8     | 87.2        | 22.6        | 3.9         | 2.0             | 5.6E-11  | 3.9E-08  |
| <i>COL25A1</i>                            | ENSG00000188517 | 362.9    | 584.2       | 129.3       | 4.5         | 2.2             | 2.6E-10  | 1.5E-07  |
| <i>DSC3</i>                               | ENSG00000134762 | 501.7    | 868.3       | 114.8       | 7.6         | 2.9             | 2.0E-08  | 5.4E-06  |
| <i>HIF1A</i>                              | ENSG00000100644 | 8355.9   | 12065.4     | 4440.3      | 2.7         | 1.4             | 5.3E-08  | 1.2E-05  |
| <i>FOXP2</i>                              | ENSG00000128573 | 39.6     | 61.1        | 16.9        | 3.6         | 1.9             | 7.3E-08  | 1.6E-05  |
| <i>WDR38</i>                              | ENSG00000136918 | 5.2      | 9.2         | 0.9         | 10.7        | 3.4             | 9.2E-08  | 1.9E-05  |
| <i>Gata6</i>                              | ENSG00000141448 | 567.2    | 820.8       | 299.5       | 2.7         | 1.5             | 1.2E-07  | 2.3E-05  |
| <i>LTBP1</i>                              | ENSG00000049323 | 1857.6   | 2812.5      | 849.8       | 3.3         | 1.7             | 1.3E-07  | 2.6E-05  |
| <i>BACH1</i>                              | ENSG00000156273 | 1103.3   | 1567.8      | 612.9       | 2.6         | 1.4             | 1.8E-07  | 3.2E-05  |
| <b>Gestational age (High in Late GA)</b>  |                 |          |             |             |             |                 |          |          |
| Gene symbol                               | Ensgene id      | baseMean | Mean early  | Mean late   | Fold Change | log2Fold Change | pval     | padj     |
| <i>MRPL33</i>                             | ENSG00000243147 | 2736.3   | 1208.1      | 4349.4      | 0.3         | -1.8            | 3.5E-12  | 3.9E-09  |
| <i>RPS21</i>                              | ENSG00000171858 | 8517.5   | 3807.0      | 13489.7     | 0.3         | -1.8            | 3.9E-12  | 4.1E-09  |
| <i>RPS29</i>                              | ENSG00000213741 | 16486.1  | 7562.2      | 25905.7     | 0.3         | -1.8            | 1.1E-11  | 1.1E-08  |
| <i>C3orf78</i>                            | ENSG00000168273 | 705.7    | 327.2       | 1105.3      | 0.3         | -1.8            | 2.4E-11  | 2.1E-08  |
| <i>C22orf26</i>                           | ENSG00000182257 | 45.5     | 19.5        | 73.0        | 0.3         | -1.9            | 3.4E-11  | 2.6E-08  |
| <i>NDUFB1</i>                             | ENSG00000183648 | 2039.1   | 1005.6      | 3129.9      | 0.3         | -1.6            | 2.9E-10  | 1.6E-07  |
| <i>SNRPG</i>                              | ENSG00000143977 | 2762.2   | 1392.3      | 4208.2      | 0.3         | -1.6            | 3.4E-10  | 1.9E-07  |
| <i>FAM36A</i>                             | ENSG00000203667 | 532.8    | 273.3       | 806.7       | 0.3         | -1.6            | 4.1E-10  | 2.2E-07  |
| <i>HoxD4</i>                              | ENSG00000170166 | 107.0    | 52.9        | 164.1       | 0.3         | -1.6            | 4.1E-10  | 2.2E-07  |
| <i>FOLR1</i>                              | ENSG00000110195 | 39.4     | 7.0         | 73.6        | 0.1         | -3.4            | 1.4E-09  | 6.4E-07  |
| <b>Culture time (High in Time 1)</b>      |                 |          |             |             |             |                 |          |          |
| Gene symbol                               | Ensgene id      | baseMean | Mean Time_1 | Mean Time_3 | Fold Change | log2Fold Change | pval     | padj     |
| <i>CA3</i>                                | ENSG00000164879 | 30.0     | 57.2        | 2.8         | 20.7        | 4.4             | 2.8E-13  | 8.2E-09  |
| <i>PLBD1</i>                              | ENSG00000121316 | 60.2     | 106.4       | 14.1        | 7.5         | 2.9             | 1.2E-12  | 1.2E-08  |
| <i>CPXM1</i>                              | ENSG00000088882 | 114.0    | 209.1       | 18.8        | 11.1        | 3.5             | 1.8E-12  | 1.3E-08  |
| <i>E2F2</i>                               | ENSG00000007968 | 40.2     | 76.1        | 4.2         | 18.2        | 4.2             | 3.9E-12  | 2.3E-08  |
| <i>KCNE3</i>                              | ENSG00000175538 | 13.7     | 24.3        | 3.1         | 7.9         | 3.0             | 1.4E-11  | 4.9E-08  |
| <i>SFXN2</i>                              | ENSG00000156398 | 134.7    | 220.1       | 49.3        | 4.5         | 2.2             | 1.6E-11  | 4.9E-08  |
| <i>HAAO</i>                               | ENSG00000162882 | 9.5      | 18.1        | 0.8         | 21.9        | 4.5             | 7.0E-11  | 1.6E-07  |

| <i>FAM111B</i>                      | ENSG00000189057 | 78.9     | 150.7       | 7.0         | 21.4        | 4.4             | 1.4E-10  | 2.9E-07  |
|-------------------------------------|-----------------|----------|-------------|-------------|-------------|-----------------|----------|----------|
| <i>BRCA2</i>                        | ENSG00000139618 | 59.8     | 108.3       | 11.2        | 9.7         | 3.3             | 2.2E-10  | 4.3E-07  |
| <i>ORC1</i>                         | ENSG00000085840 | 98.3     | 180.5       | 16.1        | 11.2        | 3.5             | 9.9E-10  | 1.8E-06  |
| <b>Culture Time (High in Time3)</b> |                 |          |             |             |             |                 |          |          |
| Gene symbol                         | Ensgene id      | baseMean | Mean Time_1 | Mean Time_3 | Fold Change | log2Fold Change | pval     | padj     |
| <i>CDKN2A</i>                       | ENSG00000147889 | 2214.8   | 775.3       | 3654.3      | 0.2         | -2.2            | 6.3E-13  | 9.3E-09  |
| <i>FBXL16</i>                       | ENSG00000127585 | 52.1     | 17.2        | 86.9        | 0.2         | -2.3            | 4.9E-12  | 2.4E-08  |
| <i>C21orf7</i>                      | ENSG00000156265 | 1169.0   | 362.3       | 1975.8      | 0.2         | -2.4            | 9.9E-12  | 4.2E-08  |
| <i>EEF1A2</i>                       | ENSG00000101210 | 2254.2   | 581.5       | 3927.0      | 0.1         | -2.8            | 1.7E-11  | 4.9E-08  |
| <i>SPRN</i>                         | ENSG00000203772 | 153.6    | 56.7        | 250.5       | 0.2         | -2.1            | 5.1E-11  | 1.3E-07  |
| <i>OXTR</i>                         | ENSG00000180914 | 1614.3   | 574.8       | 2653.8      | 0.2         | -2.2            | 3.3E-09  | 4.3E-06  |
| <i>CALY</i>                         | ENSG00000130643 | 28.2     | 9.3         | 47.1        | 0.2         | -2.3            | 5.9E-09  | 6.7E-06  |
| <i>CCND2</i>                        | ENSG00000118971 | 2812.5   | 1245.0      | 4380.1      | 0.3         | -1.8            | 6.2E-09  | 6.8E-06  |
| <i>PDE1C</i>                        | ENSG00000154678 | 876.9    | 343.7       | 1410.1      | 0.2         | -2.0            | 6.9E-09  | 7.2E-06  |
| <i>SULT4A1</i>                      | ENSG00000130540 | 38.1     | 15.7        | 60.6        | 0.3         | -1.9            | 2.9E-08  | 1.9E-05  |
| <b>Gender (High in Male)</b>        |                 |          |             |             |             |                 |          |          |
| Gene symbol                         | Ensgene id      | baseMean | mean_M      | Mean F      | Fold Change | log2Fold Change | pval     | padj     |
| <i>RPS4Y1</i>                       | ENSG00000129824 | 1194.0   | 4015.0      | 0.5         | 8092.3      | 13.0            | 5.0E-239 | 1.5E-234 |
| <i>KDM5D</i>                        | ENSG00000012817 | 137.5    | 462.4       | 0.0         | 1048576.0   | 20.0            | 1.3E-166 | 2.0E-162 |
| <i>TTY15</i>                        | ENSG00000233864 | 139.8    | 470.3       | 0.0         | 14841.2     | 13.9            | 1.4E-157 | 1.3E-153 |
| <i>CYorf15A.1</i>                   | ENSG00000099749 | 61.1     | 205.2       | 0.1         | 1662.2      | 10.7            | 1.6E-126 | 1.2E-122 |
| <i>UTY</i>                          | ENSG00000183878 | 66.6     | 218.8       | 2.3         | 96.7        | 6.6             | 7.5E-92  | 3.7E-88  |
| <i>NLGN4Y</i>                       | ENSG00000165246 | 122.5    | 407.5       | 1.9         | 216.5       | 7.8             | 8.6E-87  | 3.6E-83  |
| <i>DDX3Y</i>                        | ENSG00000067048 | 282.7    | 943.7       | 3.0         | 312.4       | 8.3             | 2.9E-79  | 9.7E-76  |
| <i>USP9Y</i>                        | ENSG00000114374 | 144.9    | 482.1       | 2.2         | 217.6       | 7.8             | 2.8E-79  | 9.7E-76  |
| <i>EIF1AY</i>                       | ENSG00000198692 | 388.2    | 1297.9      | 3.4         | 386.9       | 8.6             | 3.5E-69  | 1.0E-65  |
| <i>TTY14</i>                        | ENSG00000176728 | 11.3     | 37.9        | 0.0         | 1048576.0   | 20.0            | 3.2E-57  | 8.5E-54  |
| <i>CYorf15B.1</i>                   | ENSG00000131002 | 38.0     | 127.6       | 0.2         | 813.4       | 9.7             | 3.5E-57  | 8.5E-54  |
| <b>Gender (High in Female)</b>      |                 |          |             |             |             |                 |          |          |
| Gene symbol                         | Ensgene id      | baseMean | Mean M      | Mean F      | Fold Change | log2Fold Change | pval     | padj     |
| <i>XIST</i>                         | ENSG00000229807 | 2903.1   | 0.2         | 4131.3      | 0.0         | -14.3           | 2.9E-117 | 1.7E-113 |
| <i>TFAP2B</i>                       | ENSG00000008196 | 50.4     | 0.5         | 71.5        | 0.0         | -7.1            | 5.9E-07  | 6.4E-04  |
| <i>CYBA</i>                         | ENSG00000051523 | 8507.9   | 4038.7      | 10398.8     | 0.4         | -1.4            | 5.7E-06  | 4.4E-03  |
| <i>GPC4</i>                         | ENSG00000076716 | 664.5    | 330.2       | 805.9       | 0.4         | -1.3            | 6.9E-06  | 5.3E-03  |
| <i>PCDHA4</i>                       | ENSG00000204967 | 5.7      | 1.1         | 7.6         | 0.1         | -2.7            | 9.9E-06  | 6.3E-03  |
| <i>TMEM139</i>                      | ENSG00000178826 | 270.5    | 117.3       | 335.3       | 0.3         | -1.5            | 1.1E-05  | 6.7E-03  |
| <i>FAM36A</i>                       | ENSG00000203667 | 532.8    | 231.6       | 660.2       | 0.4         | -1.5            | 1.4E-05  | 7.9E-03  |
| <i>MPZL3</i>                        | ENSG00000160588 | 226.1    | 114.0       | 273.5       | 0.4         | -1.3            | 1.5E-05  | 8.0E-03  |
| <i>NCF2</i>                         | ENSG00000116701 | 935.0    | 415.8       | 1154.7      | 0.4         | -1.5            | 1.6E-05  | 8.1E-03  |

|      |                 |      |     |      |     |      |         |         |
|------|-----------------|------|-----|------|-----|------|---------|---------|
| HBQ1 | ENSG00000086506 | 22.5 | 8.8 | 28.3 | 0.3 | -1.7 | 1.8E-05 | 8.9E-03 |
|------|-----------------|------|-----|------|-----|------|---------|---------|

## REFERENCES

1. Phanstiel, D.H., Brumbaugh, J., Wenger, C.D., Tian, S., Probasco, M.D., Bailey, D.J., Swaney, D.L., Tervo, M.A., Bolin, J.M., Ruotti, V., et al. 2011. Proteomic and phosphoproteomic comparison of human ES and iPS cells. *Nat Meth* 8:821-827.
