# Supplementary material for: Genome-Wide Analysis Reveals the Unique Stem Cell Identity of Human Amniocytes
Source: PubMed Central journal article supplement (PMC3542377; doi:10.1371/journal.pone.0053372), 2013-01-10
Supplement: pone.0053372.s006.pdf [file pone.0053372.s006.pdf]

**Table S5.** Reference list of 150 genes for primary embryonic lineages. The 150 genes were included in our list based on the criteria; 1) previous reports show the gene playing a possible functional role in any of the three primary germ layers or in the trophoctodermal lineage during development and 2) each gene was reliably detected at significant levels in our RNA-seq dataset.

| Gene_Symbol    | Ensgene_id      | Refseq_id      | Lineage  | References |
|----------------|-----------------|----------------|----------|------------|
| <i>Egr2</i>    | ENSG00000122877 | NM_000399      | Ectoderm | [1,2]      |
| <i>Fgf5</i>    | ENSG00000138675 | NM_004464      | Ectoderm | [3,4]      |
| <i>Foxj3</i>   | ENSG00000198815 | NM_001198850   | Ectoderm | [5]        |
| <i>Gbx2</i>    | ENSG00000168505 | NM_001485.2    | Ectoderm | [4,6]      |
| <i>Lhx5</i>    | ENSG00000089116 | NM_022363      | Ectoderm | [7]        |
| <i>Lmx1a</i>   | ENSG00000162761 | NM_001033507   | Ectoderm | [8]        |
| <i>Meis1</i>   | ENSG00000143995 | NM_002398      | Ectoderm | [9,10]     |
| <i>Meis2</i>   | ENSG00000134138 | NM_170677      | Ectoderm | [9,10]     |
| <i>Nes</i>     | ENSG00000132688 | NM_006617      | Ectoderm | [11]       |
| <i>Pard6b</i>  | ENSG00000124171 | NM_032521      | Ectoderm | [12]       |
| <i>Pax2</i>    | ENSG00000075891 | NM_000278      | Ectoderm | [13-16]    |
| <i>Pax6</i>    | ENSG00000007372 | NM_000280      | Ectoderm | [17-19]    |
| <i>Penk</i>    | ENSG00000181195 | NM_001135690   | Ectoderm | [12]       |
| <i>Rbm27</i>   | ENSG00000091009 | XM_291128      | Ectoderm | [3]        |
| <i>Sox1</i>    | ENSG00000182968 | NM_005986      | Ectoderm | [20]       |
| <i>Tfcp2l1</i> | ENSG00000115112 | NM_014553      | Ectoderm | [3]        |
| <i>Trim33</i>  | ENSG00000197323 | NM_015906.3    | Ectoderm | [21]       |
| <i>Tubb3</i>   | ENSG00000198211 | NM_006086      | Ectoderm | [22]       |
| <i>Zic1</i>    | ENSG00000152977 | NM_003412      | Ectoderm | [23]       |
| <i>Afp</i>     | ENSG00000081051 | NM_001134      | Endoderm | [24,25]    |
| <i>Calcr</i>   | ENSG00000004948 | NM_001164737.1 | Endoderm | [26,27]    |
| <i>Cckbr</i>   | ENSG00000110148 | NM_176875.3    | Endoderm | [26]       |
| <i>Cer1</i>    | ENSG00000147869 | NM_005454      | Endoderm | [27]       |
| <i>Cxcr4</i>   | ENSG00000121966 | NM_001008540   | Endoderm | [27-30]    |
| <i>Cyp26a1</i> | ENSG00000095596 | NM_000783.3    | Endoderm | [26]       |
| <i>Dab2</i>    | ENSG00000153071 | NM_001343      | Endoderm | [31,32]    |
| <i>Dkk4</i>    | ENSG00000104371 | NM_014420      | Endoderm | [27]       |
| <i>Dlx3</i>    | ENSG00000064195 | NM_005220      | Endoderm | [33]       |
| <i>Dlx5</i>    | ENSG00000105880 | NM_005221      | Endoderm | [33]       |
| <i>Elf4</i>    | ENSG00000102034 | NM_001421      | Endoderm | [27]       |
| <i>Eya2</i>    | ENSG00000064655 | NM_005244      | Endoderm | [27]       |

|                |                 |                |                |            |
|----------------|-----------------|----------------|----------------|------------|
| <i>Fgf17</i>   | ENSG00000158815 | NM_003867.2    | Endoderm       | [26,27]    |
| <i>Foxa2</i>   | ENSG00000125798 | NM_153675      | Endoderm       | [26,34,35] |
| <i>Foxa3</i>   | ENSG00000170608 | NM_004497      | Endoderm       | [35,36]    |
| <i>Foxc1</i>   | ENSG00000054598 | NM_001453      | Endoderm       | [27]       |
| <i>Foxg1</i>   | ENSG00000176165 | NM_005249      | Endoderm       | [33]       |
| <i>Foxh1</i>   | ENSG00000160973 | NM_003923      | Endoderm       | [37,38]    |
| <i>Foxq1</i>   | ENSG00000164379 | NM_033260      | Endoderm       | [27]       |
| <i>Gata6</i>   | ENSG00000141448 | NM_005257      | Endoderm       | [27,39-42] |
| <i>Gpc1</i>    | ENSG00000063660 | NM_002081      | Endoderm       | [30,43]    |
| <i>Hhex</i>    | ENSG00000152804 | NM_002729      | Endoderm       | [27,44]    |
| <i>Id4</i>     | ENSG00000172201 | NM_001546      | Endoderm       | [33]       |
| <i>Krt19</i>   | ENSG00000171345 | NM_002276      | Endoderm       | [45]       |
| <i>Nts</i>     | ENSG00000133636 | NM_006183      | Endoderm       | [27]       |
| <i>Onecut1</i> | ENSG00000169856 | NM_004498      | Mixed Lineages | [46-48]    |
| <i>Pax9</i>    | ENSG00000198807 | NM_006194      | Endoderm       | [33]       |
| <i>Plxna2</i>  | ENSG00000076356 | NM_025179      | Endoderm       | [27]       |
| <i>Prdm1</i>   | ENSG00000057657 | NM_001198.3    | Endoderm       | [26,49]    |
| <i>Pyy</i>     | ENSG00000131096 | NM_004160      | Endoderm       | [50]       |
| <i>Shisa2</i>  | ENSG00000180730 | NM_001007538   | Endoderm       | [26,51]    |
| <i>Sox17</i>   | ENSG00000164736 | NM_022454      | Endoderm       | [52,53]    |
| <i>Sox7</i>    | ENSG00000171056 | NM_031439      | Endoderm       | [54,55]    |
| <i>Sp6</i>     | ENSG00000189120 | NM_199262      | Endoderm       | [33]       |
| <i>Tle2</i>    | ENSG00000065717 | NM_003260      | Endoderm       | [27]       |
| <i>Trim22</i>  | ENSG00000132274 | NM_006074      | Endoderm       | [27]       |
| <i>Tspan7</i>  | ENSG00000156298 | NM_004615      | Endoderm       | [30,56,57] |
| <i>Cxcl12</i>  | ENSG00000107562 | NM_000609      | Mesoderm       | [28,29]    |
| <i>Ednrb</i>   | ENSG00000136160 | NM_000115      | Mesoderm       | [58]       |
| <i>Foxf1</i>   | ENSG00000103241 | NM_001451      | Mesoderm       | [59-61]    |
| <i>Lhx1</i>    | ENSG00000132130 | NM_005568      | Mesoderm       | [62-64]    |
| <i>Lmo2</i>    | ENSG00000135363 | NM_001142315.1 | Mesoderm       | [26]       |
| <i>Meox1</i>   | ENSG00000005102 | NM_001040002   | Mesoderm       | [65,66]    |
| <i>Meox2</i>   | ENSG00000106511 | NM_005924      | Mesoderm       | [65,66]    |
| <i>Mesdc2</i>  | ENSG00000117899 | NM_015154      | Mesoderm       | [67]       |
| <i>Msx1</i>    | ENSG00000163132 | NM_002448      | Mesoderm       | [68-70]    |
| <i>Msx2</i>    | ENSG00000120149 | NM_002449      | Mesoderm       | [70,71]    |
| <i>Myl4</i>    | ENSG00000198336 | NM_001002841   | Mesoderm       | [72]       |
| <i>Myocd</i>   | ENSG00000141052 | NM_153604      | Mesoderm       | [73]       |
| <i>Pbx1</i>    | ENSG00000185630 | NM_001204961   | Mesoderm       | [74-76]    |
| <i>Ror2</i>    | ENSG00000169071 | NM_004560      | Mesoderm       | [77,78]    |
| <i>Sox6</i>    | ENSG00000110693 | NM_001145819   | Mesoderm       | [79,80]    |
| <i>Tbx6</i>    | ENSG00000149922 | NM_004608      | Mesoderm       | [81-85]    |

|              |                 |                |                |               |
|--------------|-----------------|----------------|----------------|---------------|
| <i>Tcf15</i> | ENSG00000125878 | NM_004609      | Mesoderm       | [86]          |
| <i>Wnt5a</i> | ENSG00000114251 | NM_001256105.1 | Mesoderm       | [87,88]       |
| <i>Wnt5b</i> | ENSG00000111186 | NM_030775.2    | Mesoderm       | [89]          |
| <i>Wnt8a</i> | ENSG00000061492 | NM_058244      | Mesoderm       | [90-92]       |
| <i>Anxa4</i> | ENSG00000196975 | NM_001153      | Mixed Lineages | [45]          |
| <i>Bmp2</i>  | ENSG00000125845 | NM_001200      | Mixed Lineages | [93-96]       |
| <i>Bmp4</i>  | ENSG00000125378 | NM_001202      | Mixed Lineages | [93,97,98]    |
| <i>Cdx2</i>  | ENSG00000165556 | NM_001265      | Mixed Lineages | [99-101]      |
| <i>Dkk1</i>  | ENSG00000107984 | NM_012242      | Mixed Lineages | [102-105]     |
| <i>Dsg2</i>  | ENSG00000046604 | NM_001943      | Mixed Lineages | [45]          |
| <i>Eomes</i> | ENSG00000163508 | NM_005442      | Mixed Lineages | [99,106]      |
| <i>Fgf8</i>  | ENSG00000107831 | NM_001206389.1 | Mixed Lineages | [107-109]     |
| <i>Foxa1</i> | ENSG00000129514 | NM_004496      | Mixed Lineages | [34,110,111]  |
| <i>Gata3</i> | ENSG00000107485 | NM_002051      | Mixed Lineages | [112-114]     |
| <i>Gata4</i> | ENSG00000136574 | NM_002052      | Mixed Lineages | [60,115-118]  |
| <i>Gdf3</i>  | ENSG00000184344 | NM_020634      | Mixed Lineages | [119,120]     |
| <i>Gsc</i>   | ENSG00000133937 | NM_173849      | Mixed Lineages | [30,121-125]  |
| <i>Hand1</i> | ENSG00000113196 | NM_004821      | Mixed Lineages | [126-129]     |
| <i>Hand2</i> | ENSG00000164107 | NM_021973      | Mixed Lineages | [127,130-132] |
| <i>Hnf4a</i> | ENSG00000101076 | NM_001030003   | Mixed Lineages | [133,134]     |
| <i>Hox1a</i> | ENSG00000105991 | NM_005522      | Mixed Lineages | [135-137]     |
| <i>Hoxb1</i> | ENSG00000120094 | NM_002144      | Mixed Lineages | [137-139]     |
| <i>Isl1</i>  | ENSG00000016082 | NM_002202      | Mixed Lineages | [140-142]     |
| <i>Kdr</i>   | ENSG00000128052 | NM_002253      | Mixed Lineages | [143,144]     |
| <i>Mesp1</i> | ENSG00000166823 | NM_018670      | Mixed Lineages | [145]         |
| <i>Mesp2</i> | ENSG00000188095 | NM_001039958   | Mixed Lineages | [146]         |

|                |                 |              |                |              |
|----------------|-----------------|--------------|----------------|--------------|
| <i>Mixl1</i>   | ENSG00000185155 | NM_031944    | Mixed Lineages | [147,148]    |
| <i>Otx1</i>    | ENSG00000115507 | NM_001199770 | Mixed Lineages | [13,149,150] |
| <i>Otx2</i>    | ENSG00000165588 | NM_021728.2  | Mixed Lineages | [13,149]     |
| <i>Pdgfra</i>  | ENSG00000134853 | NM_006206    | Mixed Lineages | [42,151-153] |
| <i>Pdgfrb</i>  | ENSG00000113721 | NM_002609    | Mixed Lineages | [154,155]    |
| <i>Ripk4</i>   | ENSG00000183421 | NM_020639    | Mixed Lineages | [45]         |
| <i>T</i>       | ENSG00000164458 | NM_003181    | Mixed Lineages | [81,156-161] |
| <i>Wnt3a</i>   | ENSG00000154342 | NM_033131    | Mixed Lineages | [81,85,162]  |
| <i>Akr1b1</i>  | ENSG00000085662 | NM_001628    | Trophectoderm  | [163]        |
| <i>Ascl2</i>   | ENSG00000183734 | NM_005170    | Trophectoderm  | [164-166]    |
| <i>Cebpb</i>   | ENSG00000172216 | NM_005194    | Trophectoderm  | [167]        |
| <i>Cgb</i>     | ENSG00000104827 | NM_000737    | Trophectoderm  | [168]        |
| <i>Cgb1</i>    | ENSG00000204748 | NM_033377    | Trophectoderm  | [169]        |
| <i>Cgb2</i>    | ENSG00000104818 | NM_033378    | Trophectoderm  | [169]        |
| <i>Cgb5</i>    | ENSG00000189052 | NM_033043    | Trophectoderm  | [170,171]    |
| <i>Cgb7</i>    | ENSG00000196337 | NM_033142    | Trophectoderm  | [170]        |
| <i>Cgb8</i>    | ENSG00000213030 | NM_033183    | Trophectoderm  | [170]        |
| <i>Csh1</i>    | ENSG00000136488 | NM_001317    | Trophectoderm  | [165,172]    |
| <i>Csh2</i>    | ENSG00000213218 | NM_020991    | Trophectoderm  | [173]        |
| <i>Ctsc</i>    | ENSG00000109861 | NM_001814    | Trophectoderm  | [77]         |
| <i>Cyp19a1</i> | ENSG00000137869 | NM_000103    | Trophectoderm  | [77,174]     |
| <i>Elf5</i>    | ENSG00000135374 | NM_001422    | Trophectoderm  | [175-178]    |
| <i>Enpep</i>   | ENSG00000138792 | NM_001977    | Trophectoderm  | [77]         |
| <i>Esx1</i>    | ENSG00000123576 | NM_153448    | Trophectoderm  | [179]        |
| <i>Ets2</i>    | ENSG00000157557 | NM_001256295 | Trophectoderm  | [180,181]    |
| <i>Fgfr1</i>   | ENSG00000077782 | NM_023108    | Trophectoderm  | [182]        |
| <i>Gcm1</i>    | ENSG00000137270 | NM_003643    | Trophectoderm  | [183,184]    |
| <i>H19</i>     | ENSG00000130600 | NR_002196    | Trophectoderm  | [185]        |
| <i>Krt7</i>    | ENSG00000135480 | NM_005556    | Trophectoderm  | [186]        |
| <i>Krt8</i>    | ENSG00000170421 | NM_002273    | Trophectoderm  | [187]        |
| <i>Lhb</i>     | ENSG00000104826 | NM_000894    | Trophectoderm  | [188]        |
| <i>Lhcgr</i>   | ENSG00000138039 | NM_000233    | Trophectoderm  | [189]        |
| <i>Lifr</i>    | ENSG00000113594 | NM_001127671 | Trophectoderm  | [190]        |
| <i>Plac1</i>   | ENSG00000170965 | NM_021796    | Trophectoderm  | [191,192]    |
| <i>Plac2</i>   | ENSG00000223573 | NR_027064    | Trophectoderm  | [77]         |
| <i>Psg1</i>    | ENSG00000231924 | NM_006905    | Trophectoderm  | [193,194]    |

|               |                 |              |               |           |
|---------------|-----------------|--------------|---------------|-----------|
| <i>Psg11</i>  | ENSG00000243130 | NM_203287    | Trophectoderm | [193]     |
| <i>Psg2</i>   | ENSG00000242221 | NM_031246    | Trophectoderm | [193]     |
| <i>Psg3</i>   | ENSG00000221826 | NM_021016    | Trophectoderm | [194]     |
| <i>Psg4</i>   | ENSG00000243137 | NM_213633    | Trophectoderm | [195]     |
| <i>Psg5</i>   | ENSG00000204941 | NM_001130014 | Trophectoderm | [194]     |
| <i>Psg6</i>   | ENSG00000170848 | NM_002782    | Trophectoderm | [196,197] |
| <i>Psg7</i>   | ENSG00000221878 | NM_001206650 | Trophectoderm | [194]     |
| <i>Psg8</i>   | ENSG00000124467 | NM_001130167 | Trophectoderm | [198]     |
| <i>Psg9</i>   | ENSG00000183668 | NM_002784    | Trophectoderm | [198]     |
| <i>Rsl1d1</i> | ENSG00000171490 | NM_015659    | Trophectoderm | [199]     |
| <i>Stra13</i> | ENSG00000169689 | NM_144998    | Trophectoderm | [200]     |
| <i>Tead4</i>  | ENSG00000197905 | NM_003213    | Trophectoderm | [201-203] |
| <i>Tfap2c</i> | ENSG00000087510 | NM_003222    | Trophectoderm | [204]     |
| <i>Thbd</i>   | ENSG00000178726 | NM_000361    | Trophectoderm | [205,206] |
| <i>Vtcn1</i>  | ENSG00000134258 | NM_024626    | Trophectoderm | [77]      |

## REFERENCES

1. Lee EK, Bae GU, You JS, Lee JC, Jeon YJ, et al. (2009) Reversine increases the plasticity of lineage-committed cells toward neuroectodermal lineage. *The Journal of biological chemistry* 284: 2891-901.
2. Sun Z, Zhao J, Zhang Y, Meng A (2006) Sp5l is a mediator of Fgf signals in anteroposterior patterning of the neuroectoderm in zebrafish embryo. *Developmental dynamics : an official publication of the American Association of Anatomists* 235: 2999-3006.
3. Pelton TA, Sharma S, Schulz TC, Rathjen J, Rathjen PD (2002) Transient pluripotent cell populations during primitive ectoderm formation: correlation of in vivo and in vitro pluripotent cell development. *J Cell Sci* 115: 329-39.
4. Rathjen J, Lake JA, Bettess MD, Washington JM, Chapman G, et al. (1999) Formation of a primitive ectoderm like cell population, EPL cells, from ES cells in response to biologically derived factors. *J Cell Sci* 112 ( Pt 5): 601-12.
5. Landgren H, Carlsson P (2004) FoxJ3, a novel mammalian forkhead gene expressed in neuroectoderm, neural crest, and myotome. *Developmental dynamics : an official publication of the American Association of Anatomists* 231: 396-401.
6. Kimura C, Shen MM, Takeda N, Aizawa S, Matsuo I (2001) Complementary functions of Otx2 and Cripto in initial patterning of mouse epiblast. *Developmental biology* 235: 12-32.
7. Toyama R, Curtiss PE, Otani H, Kimura M, Dawid IB, et al. (1995) The LIM class homeobox gene *lim5*: implied role in CNS patterning in *Xenopus* and zebrafish. *Developmental biology* 170: 583-93.

8. Chizhikov VV, Millen KJ (2004) Control of roof plate formation by Lmx1a in the developing spinal cord. *Development* 131: 2693-705.
9. Mercader N, Leonardo E, Piedra ME, Martinez AC, Ros MA, et al. (2000) Opposing RA and FGF signals control proximodistal vertebrate limb development through regulation of Meis genes. *Development* 127: 3961-70.
10. Zhang X, Friedman A, Heaney S, Purcell P, Maas RL (2002) Meis homeoproteins directly regulate Pax6 during vertebrate lens morphogenesis. *Genes & Development* 16: 2097-107.
11. Dubois NC, Hofmann D, Kaloulis K, Bishop JM, Trumpp A (2006) Nestin-Cre transgenic mouse line Nes-Cre1 mediates highly efficient Cre/loxP mediated recombination in the nervous system, kidney, and somite-derived tissues. *Genesis* 44: 355-60.
12. Harvey NT, Hughes JN, Lonic A, Yap C, Long C, et al. (2010) Response to BMP4 signalling during ES cell differentiation defines intermediates of the ectoderm lineage. *J Cell Sci* 123: 1796-804.
13. Acampora D, Annino A, Puelles E, Alfano I, Tuorto F, et al. (2003) OTX1 compensates for OTX2 requirement in regionalisation of anterior neuroectoderm. *Gene Expr Patterns* 3: 497-501.
14. Bovolenta P, Mallamaci A, Briata P, Corte G, Boncinelli E (1997) Implication of OTX2 in pigment epithelium determination and neural retina differentiation. *J Neurosci* 17: 4243-52.
15. Lun K, Brand M (1998) A series of no isthmus (noi) alleles of the zebrafish pax2.1 gene reveals multiple signaling events in development of the midbrain-hindbrain boundary. *Development* 125: 3049-62.
16. Rhinn M, Dierich A, Shawlot W, Behringer RR, Le Meur M, et al. (1998) Sequential roles for Otx2 in visceral endoderm and neuroectoderm for forebrain and midbrain induction and specification. *Development* 125: 845-56.
17. Grindley JC, Davidson DR, Hill RE (1995) The role of Pax-6 in eye and nasal development. *Development* 121: 1433-42.
18. Li HS, Yang JM, Jacobson RD, Pasko D, Sundin O (1994) Pax-6 is first expressed in a region of ectoderm anterior to the early neural plate: implications for stepwise determination of the lens. *Developmental biology* 162: 181-94.
19. Quinn JC, West JD, Hill RE (1996) Multiple functions for Pax6 in mouse eye and nasal development. *Genes & Development* 10: 435-46.
20. Pevny LH, Sockanathan S, Placzek M, Lovell-Badge R (1998) A role for SOX1 in neural determination. *Development* 125: 1967-78.
21. Morsut L, Yan KP, Enzo E, Aragona M, Soligo SM, et al. (2010) Negative control of Smad activity by ectoderm/Tif1gamma patterns the mammalian embryo. *Development* 137: 2571-8.

22. Anokye-Danso F, Trivedi CM, Juhr D, Gupta M, Cui Z, et al. (2011) Highly efficient miRNA-mediated reprogramming of mouse and human somatic cells to pluripotency. *Cell Stem Cell* 8: 376-88.
23. Nagai T, Aruga J, Takada S, Gunther T, Sporle R, et al. (1997) The expression of the mouse *Zic1*, *Zic2*, and *Zic3* gene suggests an essential role for *Zic* genes in body pattern formation. *Developmental biology* 182: 299-313.
24. Jones EA, Clement-Jones M, James OF, Wilson DI (2001) Differences between human and mouse alpha-fetoprotein expression during early development. *Journal of anatomy* 198: 555-9.
25. Kwon GS, Fraser ST, Eakin GS, Mangano M, Isern J, et al. (2006) Tg(Afp-GFP) expression marks primitive and definitive endoderm lineages during mouse development. *Developmental dynamics : an official publication of the American Association of Anatomists* 235: 2549-58.
26. Bernardo Andreia S, Faial T, Gardner L, Niakan Kathy K, Ortmann D, et al. (2011) BRACHYURY and CDX2 Mediate BMP-Induced Differentiation of Human and Mouse Pluripotent Stem Cells into Embryonic and Extraembryonic Lineages. *Cell Stem Cell* 9: 144-55.
27. McLean AB, D'Amour KA, Jones KL, Krishnamoorthy M, Kulik MJ, et al. (2007) Activin a efficiently specifies definitive endoderm from human embryonic stem cells only when phosphatidylinositol 3-kinase signaling is suppressed. *Stem Cells* 25: 29-38.
28. D'Amour KA, Agulnick AD, Eliazzer S, Kelly OG, Kroon E, et al. (2005) Efficient differentiation of human embryonic stem cells to definitive endoderm. *Nature Biotechnology* 23: 1534-41.
29. McGrath KE, Koniski AD, Maltby KM, McGann JK, Palis J (1999) Embryonic expression and function of the chemokine SDF-1 and its receptor, CXCR4. *Developmental biology* 213: 442-56.
30. Yasunaga M, Tada S, Torikai-Nishikawa S, Nakano Y, Okada M, et al. (2005) Induction and monitoring of definitive and visceral endoderm differentiation of mouse ES cells. *Nature Biotechnology* 23: 1542-50.
31. Niakan KK, Ji H, Maehr R, Vokes SA, Rodolfa KT, et al. (2010) Sox17 promotes differentiation in mouse embryonic stem cells by directly regulating extraembryonic gene expression and indirectly antagonizing self-renewal. *Genes & Development* 24: 312-26.
32. Morrissey EE, Musco S, Chen MY, Lu MM, Leiden JM, et al. (2000) The gene encoding the mitogen-responsive phosphoprotein Dab2 is differentially regulated by GATA-6 and GATA-4 in the visceral endoderm. *The Journal of biological chemistry* 275: 19949-54.
33. Sherwood RI, Jitianu C, Cleaver O, Shaywitz DA, Lamenzo JO, et al. (2007) Prospective isolation and global gene expression analysis of definitive and visceral endoderm. *Developmental biology* 304: 541-55.

34. Ang SL, Wierda A, Wong D, Stevens KA, Cascio S, et al. (1993) The formation and maintenance of the definitive endoderm lineage in the mouse: involvement of HNF3/forkhead proteins. *Development* 119: 1301-15.
35. Dufort D, Schwartz L, Harpal K, Rossant J (1998) The transcription factor HNF3beta is required in visceral endoderm for normal primitive streak morphogenesis. *Development* 125: 3015-25.
36. Hiemisch H, Schutz G, Kaestner KH (1997) Transcriptional regulation in endoderm development: characterization of an enhancer controlling Hnf3g expression by transgenesis and targeted mutagenesis. *Embo J* 16: 3995-4006.
37. Hoodless PA, Pye M, Chazaud C, Labbe E, Attisano L, et al. (2001) FoxH1 (Fast) functions to specify the anterior primitive streak in the mouse. *Genes & Development* 15: 1257-71.
38. McKnight KD, Hou J, Hoodless PA (2010) Foxh1 and Foxa2 are not required for formation of the midgut and hindgut definitive endoderm. *Developmental biology* 337: 471-81.
39. Hay DC, Sutherland L, Clark J, Burdon T (2004) Oct-4 knockdown induces similar patterns of endoderm and trophoblast differentiation markers in human and mouse embryonic stem cells. *Stem Cells* 22: 225-35.
40. Chazaud C, Yamanaka Y, Pawson T, Rossant J (2006) Early lineage segregation between epiblast and primitive endoderm in mouse blastocysts through the Grb2-MAPK pathway. *Developmental Cell* 10: 615-24.
41. Li L, Arman E, Ekblom P, Edgar D, Murray P, et al. (2004) Distinct GATA6- and laminin-dependent mechanisms regulate endodermal and ectodermal embryonic stem cell fates. *Development* 131: 5277-86.
42. Plusa B, Piliszek A, Frankenberg S, Artus J, Hadjantonakis AK (2008) Distinct sequential cell behaviours direct primitive endoderm formation in the mouse blastocyst. *Development* 135: 3081-91.
43. Filmus J (2001) Glypicans in growth control and cancer. *Glycobiology* 11(3):19R-23R.
44. Thomas PQ, Brown A, Beddington RS (1998) Hex: a homeobox gene revealing peri-implantation asymmetry in the mouse embryo and an early transient marker of endothelial cell precursors. *Development* 125: 85-94.
45. Brown K, Legros S, Artus J, Doss MX, Khanin R, et al. (2010) A comparative analysis of extra-embryonic endoderm cell lines. *PLoS One* 5: e12016.
46. Jacquemin P, Yoshitomi H, Kashima Y, Rousseau GG, Lemaigre FP, et al. (2006) An endothelial-mesenchymal relay pathway regulates early phases of pancreas development. *Developmental biology* 290: 189-99.



47. Rausa F, Samadani U, Ye H, Lim L, Fletcher CF, et al. (1997) The cut-homeodomain transcriptional activator HNF-6 is coexpressed with its target gene HNF-3 beta in the developing murine liver and pancreas. *Developmental biology* 192: 228-46.
48. Pierreux CE, Vanhorenbeeck V, Jacquemin P, Lemaigre FP, Rousseau GG (2004) The transcription factor hepatocyte nuclear factor-6/Onecut-1 controls the expression of its paralog Onecut-3 in developing mouse endoderm. *The Journal of biological chemistry* 279: 51298-304.
49. Chang DH, Cattoretti G, Calame KL (2002) The dynamic expression pattern of B lymphocyte induced maturation protein-1 (Blimp-1) during mouse embryonic development. *Mechanisms of Development* 117: 305-9.
50. Hou J, Charters AM, Lee SC, Zhao Y, Wu MK, et al. (2007) A systematic screen for genes expressed in definitive endoderm by Serial Analysis of Gene Expression (SAGE). *BMC developmental biology* 7: 92.
51. Filipe M, Goncalves L, Bento M, Silva AC, Belo JA (2006) Comparative expression of mouse and chicken Shisa homologues during early development. *Developmental dynamics : an official publication of the American Association of Anatomists* 235: 2567-73.
52. Frankenberg S, Gerbe F, Bessonard S, Belville C, Pouchin P, et al. (2011) Primitive endoderm differentiates via a three-step mechanism involving Nanog and RTK signaling. *Developmental Cell* 21: 1005-13.
53. Kanai-Azuma M, Kanai Y, Gad JM, Tajima Y, Taya C, et al. (2002) Depletion of definitive gut endoderm in Sox17-null mutant mice. *Development* 129: 2367-79.
54. Niimi T, Hayashi Y, Futaki S, Sekiguchi K (2004) SOX7 and SOX17 regulate the parietal endoderm-specific enhancer activity of mouse laminin alpha1 gene. *The Journal of biological chemistry* 279: 38055-61.
55. Futaki S, Hayashi Y, Emoto T, Weber CN, Sekiguchi K (2004) Sox7 plays crucial roles in parietal endoderm differentiation in F9 embryonal carcinoma cells through regulating Gata-4 and Gata-6 expression. *Molecular and Cellular Biology* 24: 10492-503.
56. Holtzinger A, Rosenfeld GE, Evans T (2010) Gata4 directs development of cardiac-inducing endoderm from ES cells. *Developmental biology* 337: 63-73.
57. Hemler ME (2001) Specific tetraspanin functions. *The Journal of cell biology* 155: 1103-7.
58. Welsh IC, O'Brien TP (2000) Loss of late primitive streak mesoderm and interruption of left-right morphogenesis in the Ednrb(s-1Acrg) mutant mouse. *Developmental biology* 225: 151-68.
59. Mahlapuu M, Ormestad M, Enerback S, Carlsson P (2001) The forkhead transcription factor Foxf1 is required for differentiation of extra-embryonic and lateral plate mesoderm. *Development* 128: 155-66.

60. Rojas A, De Val S, Heidt AB, Xu SM, Bristow J, et al. (2005) Gata4 expression in lateral mesoderm is downstream of BMP4 and is activated directly by Forkhead and GATA transcription factors through a distal enhancer element. *Development* 132: 3405-17.
61. Ormestad M, Astorga J, Carlsson P (2004) Differences in the embryonic expression patterns of mouse Foxf1 and -2 match their distinct mutant phenotypes. *Developmental dynamics : an official publication of the American Association of Anatomists* 229: 328-33.
62. Barnes JD, Crosby JL, Jones CM, Wright CV, Hogan BL (1994) Embryonic expression of Lim-1, the mouse homolog of Xenopus Xlim-1, suggests a role in lateral mesoderm differentiation and neurogenesis. *Developmental biology* 161: 168-78.
63. Tsang TE, Shawlot W, Kinder SJ, Kobayashi A, Kwan KM, et al. (2000) Lim1 activity is required for intermediate mesoderm differentiation in the mouse embryo. *Developmental biology* 223: 77-90.
64. Cirio MC, Hui Z, Haldin CE, Cosentino CC, Stuckenholz C, et al. (2011) Lhx1 is required for specification of the renal progenitor cell field. *PLoS One* 6: e18858.
65. Candia AF, Hu J, Crosby J, Lalley PA, Noden D, et al. (1992) Mox-1 and Mox-2 define a novel homeobox gene subfamily and are differentially expressed during early mesodermal patterning in mouse embryos. *Development* 116: 1123-36.
66. Candia AF, Wright CV (1996) Differential localization of Mox-1 and Mox-2 proteins indicates distinct roles during development. *The International Journal of Developmental Biology* 40: 1179-84.
67. Wines ME, Lee L, Katari MS, Zhang L, DeRossi C, et al. (2001) Identification of mesoderm development (mesd) candidate genes by comparative mapping and genome sequence analysis. *Genomics* 72: 88-98.
68. Rashbass P, Wilson V, Rosen B, Beddington RS (1994) Alterations in gene expression during mesoderm formation and axial patterning in Brachyury (T) embryos. *The International Journal of Developmental Biology* 38: 35-44.
69. Satokata I, Maas R (1994) Msx1 deficient mice exhibit cleft palate and abnormalities of craniofacial and tooth development. *Nature Genetics* 6: 348-56.
70. Bensoussan-Trigano V, Lallemand Y, Saint Cloment C, Robert B (2011) Msx1 and Msx2 in limb mesenchyme modulate digit number and identity. *Developmental dynamics : an official publication of the American Association of Anatomists* 240: 1190-202.
71. Liu YH, Ma L, Wu LY, Luo W, Kundu R, et al. (1994) Regulation of the Msx2 homeobox gene during mouse embryogenesis: a transgene with 439 bp of 5' flanking sequence is expressed exclusively in the apical ectodermal ridge of the developing limb. *Mechanisms of Development* 48: 187-97.
72. Jagtap S, Meganathan K, Gaspar J, Wagh V, Winkler J, et al. (2011) Cytosine arabinoside induces ectoderm and inhibits mesoderm expression in human embryonic stem cells during multilineage differentiation. *Br J Pharmacol* 162: 1743-56.

73. Han Z, Li X, Wu J, Olson EN (2004) A myocardin-related transcription factor regulates activity of serum response factor in *Drosophila*. *Proceedings of the National Academy of Sciences of the United States of America* 101: 12567-72.
74. Capellini TD, Zewdu R, Di Giacomo G, Asciutti S, Kugler JE, et al. (2008) Pbx1/Pbx2 govern axial skeletal development by controlling Polycomb and Hox in mesoderm and Pax1/Pax9 in sclerotome. *Developmental biology* 321: 500-14.
75. Schnabel CA, Selleri L, Jacobs Y, Warnke R, Cleary ML (2001) Expression of Pbx1b during mammalian organogenesis. *Mechanisms of Development* 100: 131-5.
76. Schnabel CA, Godin RE, Cleary ML (2003) Pbx1 regulates nephrogenesis and ureteric branching in the developing kidney. *Developmental biology* 254: 262-76.
77. Drukker M, Tang C, Ardehali R, Rinkevich Y, Seita J, et al. (2012) Isolation of primitive endoderm, mesoderm, vascular endothelial and trophoblast progenitors from human pluripotent stem cells. *Nature Biotechnology* 30(6):531-42
78. Hikasa H, Shibata M, Hiratani I, Taira M (2002) The *Xenopus* receptor tyrosine kinase *Xror2* modulates morphogenetic movements of the axial mesoderm and neuroectoderm via Wnt signaling. *Development* 129: 5227-39.
79. Chimal-Monroy J, Rodriguez-Leon J, Montero JA, Ganan Y, Macias D, et al. (2003) Analysis of the molecular cascade responsible for mesodermal limb chondrogenesis: Sox genes and BMP signaling. *Developmental biology* 257: 292-301.
80. Brent AE, Braun T, Tabin CJ (2005) Genetic analysis of interactions between the somitic muscle, cartilage and tendon cell lineages during mouse development. *Development* 132: 515-28.
81. Yamaguchi TP, Takada S, Yoshikawa Y, Wu N, McMahon AP (1999) T (Brachyury) is a direct target of Wnt3a during paraxial mesoderm specification. *Genes & Development* 13: 3185-90.
82. Chapman DL, Agulnik I, Hancock S, Silver LM, Papaioannou VE (1996) Tbx6, a mouse T-Box gene implicated in paraxial mesoderm formation at gastrulation. *Developmental biology* 180: 534-42.
83. Chapman DL, Cooper-Morgan A, Harrelson Z, Papaioannou VE (2003) Critical role for Tbx6 in mesoderm specification in the mouse embryo. *Mechanisms of Development* 120: 837-47.
84. Yasuhiko Y, Kitajima S, Takahashi Y, Oginuma M, Kagiwada H, et al. (2008) Functional importance of evolutionally conserved Tbx6 binding sites in the presomitic mesoderm-specific enhancer of *Mesp2*. *Development* 135: 3511-9.
85. Nowotschin S, Ferrer-Vaquer A, Concepcion D, Papaioannou VE, Hadjantonakis AK (2012) Interaction of Wnt3a, *Msgn1* and Tbx6 in neural versus paraxial mesoderm lineage commitment and paraxial mesoderm differentiation in the mouse embryo. *Developmental biology* 367(1):1-14.

86. Quertermous EE, Hidai H, Blonar MA, Quertermous T (1994) Cloning and characterization of a basic helix-loop-helix protein expressed in early mesoderm and the developing somites. *Proceedings of the National Academy of Sciences of the United States of America* 91: 7066-70.
87. Tajbakhsh S, Borello U, Vivarelli E, Kelly R, Papkoff J, et al. (1998) Differential activation of Myf5 and MyoD by different Wnts in explants of mouse paraxial mesoderm and the later activation of myogenesis in the absence of Myf5. *Development* 125: 4155-62.
88. Yamaguchi TP, Bradley A, McMahon AP, Jones S (1999) A Wnt5a pathway underlies outgrowth of multiple structures in the vertebrate embryo. *Development* 126: 1211-23.
89. Fazzi R, Pacini S, Carnicelli V, Trombi L, Montali M, et al. (2011) Mesodermal progenitor cells (MPCs) differentiate into mesenchymal stromal cells (MSCs) by activation of Wnt5/calmodulin signalling pathway. *PLoS One* 6: e25600.
90. Kelly GM, Greenstein P, Erezyilmaz DF, Moon RT (1995) Zebrafish wnt8 and wnt8b share a common activity but are involved in distinct developmental pathways. *Development* 121: 1787-99.
91. Hoppler S, Moon RT (1998) BMP-2/-4 and Wnt-8 cooperatively pattern the *Xenopus* mesoderm. *Mechanisms of Development* 71: 119-29.
92. Lekven AC, Thorpe CJ, Waxman JS, Moon RT (2001) Zebrafish wnt8 encodes two wnt8 proteins on a bicistronic transcript and is required for mesoderm and neurectoderm patterning. *Developmental Cell* 1: 103-14.
93. Neave B, Holder N, Patient R (1997) A graded response to BMP-4 spatially coordinates patterning of the mesoderm and ectoderm in the zebrafish. *Mechanisms of Development* 62: 183-95.
94. Zhang H, Bradley A (1996) Mice deficient for BMP2 are nonviable and have defects in amnion/chorion and cardiac development. *Development* 122: 2977-86.
95. Ying Y, Zhao GQ (2001) Cooperation of endoderm-derived BMP2 and extraembryonic ectoderm-derived BMP4 in primordial germ cell generation in the mouse. *Developmental biology* 232: 484-92.
96. Madabhushi M, Lacy E (2011) Anterior visceral endoderm directs ventral morphogenesis and placement of head and heart via BMP2 expression. *Developmental Cell* 21: 907-19.
97. Winnier G, Blessing M, Labosky PA, Hogan BL (1995) Bone morphogenetic protein-4 is required for mesoderm formation and patterning in the mouse. *Genes & Development* 9: 2105-16.
98. Pourquie O, Fan CM, Coltey M, Hirsinger E, Watanabe Y, et al. (1996) Lateral and axial signals involved in avian somite patterning: a role for BMP4. *Cell* 84: 461-71.
99. Strumpf D, Mao CA, Yamanaka Y, Ralston A, Chawengsaksophak K, et al. (2005) Cdx2 is required for correct cell fate specification and differentiation of trophectoderm in the mouse blastocyst. *Development* 132: 2093-102.

100. van den Akker E, Forlani S, Chawengsaksophak K, de Graaff W, Beck F, et al. (2002) Cdx1 and Cdx2 have overlapping functions in anteroposterior patterning and posterior axis elongation. *Development* 129: 2181-93.
101. Grainger S, Lam J, Savory JG, Mears AJ, Rijli FM, et al. (2012) Cdx regulates Dll1 in multiple lineages. *Developmental biology* 361: 1-11.
102. Monaghan AP, Kioschis P, Wu W, Zuniga A, Bock D, et al. (1999) Dickkopf genes are co-ordinately expressed in mesodermal lineages. *Mechanisms of Development* 87: 45-56.
103. Hashimoto H, Itoh M, Yamanaka Y, Yamashita S, Shimizu T, et al. (2000) Zebrafish Dkk1 functions in forebrain specification and axial mesendoderm formation. *Developmental biology* 217: 138-52.
104. Mukhopadhyay M, Shtrom S, Rodriguez-Esteban C, Chen L, Tsukui T, et al. (2001) Dickkopf1 is required for embryonic head induction and limb morphogenesis in the mouse. *Developmental Cell* 1: 423-34.
105. Miura S, Singh AP, Mishina Y (2010) Bmpr1a is required for proper migration of the AVE through regulation of Dkk1 expression in the pre-streak mouse embryo. *Developmental biology* 341: 246-54.
106. Russ AP, Wattler S, Colledge WH, Aparicio SA, Carlton MB, et al. (2000) Eomesodermin is required for mouse trophoblast development and mesoderm formation. *Nature* 404: 95-9.
107. Crossley PH, Martin GR (1995) The mouse Fgf8 gene encodes a family of polypeptides and is expressed in regions that direct outgrowth and patterning in the developing embryo. *Development* 121: 439-51.
108. Ohuchi H, Yoshioka H, Tanaka A, Kawakami Y, Nohno T, et al. (1994) Involvement of androgen-induced growth factor (FGF-8) gene in mouse embryogenesis and morphogenesis. *Biochemical and biophysical research communications* 204: 882-8.
109. Zheng Z, de longh RU, Rathjen PD, Rathjen J (2010) A requirement for FGF signalling in the formation of primitive streak-like intermediates from primitive ectoderm in culture. *PLoS One* 5: e12555.
110. Miura N, Wanaka A, Tohyama M, Tanaka K (1993) MFH-1, a new member of the fork head domain family, is expressed in developing mesenchyme. *FEBS Lett* 326: 171-6.
111. Monaghan AP, Kaestner KH, Grau E, Schutz G (1993) Postimplantation expression patterns indicate a role for the mouse forkhead/HNF-3 alpha, beta and gamma genes in determination of the definitive endoderm, chordamesoderm and neuroectoderm. *Development* 119: 567-78.
112. Neave B, Rodaway A, Wilson SW, Patient R, Holder N (1995) Expression of zebrafish GATA 3 (*gta3*) during gastrulation and neurulation suggests a role in the specification of cell fate. *Mechanisms of Development* 51: 169-82.

113. Sheng G, Stern CD (1999) Gata2 and Gata3: novel markers for early embryonic polarity and for non-neural ectoderm in the chick embryo. *Mechanisms of Development* 87: 213-6.
114. Manaia A, Lemarchandel V, Klaine M, Max-Audit I, Romeo P, et al. (2000) Lmo2 and GATA-3 associated expression in intraembryonic hemogenic sites. *Development* 127: 643-53.
115. Kelley C, Blumberg H, Zon LI, Evans T (1993) GATA-4 is a novel transcription factor expressed in endocardium of the developing heart. *Development* 118: 817-27.
116. Soudais C, Bielinska M, Heikinheimo M, MacArthur CA, Narita N, et al. (1995) Targeted mutagenesis of the transcription factor GATA-4 gene in mouse embryonic stem cells disrupts visceral endoderm differentiation in vitro. *Development* 121: 3877-88.
117. Arceci RJ, King AA, Simon MC, Orkin SH, Wilson DB (1993) Mouse GATA-4: a retinoic acid-inducible GATA-binding transcription factor expressed in endodermally derived tissues and heart. *Molecular and Cellular Biology* 13: 2235-46.
118. Bossard P, Zaret KS (1998) GATA transcription factors as potentiators of gut endoderm differentiation. *Development* 125: 4909-17.
119. Chen C, Ware SM, Sato A, Houston-Hawkins DE, Habas R, et al. (2006) The Vg1-related protein Gdf3 acts in a Nodal signaling pathway in the pre-gastrulation mouse embryo. *Development* 133: 319-29.
120. Andersson O, Bertolino P, Ibanez CF (2007) Distinct and cooperative roles of mammalian Vg1 homologs GDF1 and GDF3 during early embryonic development. *Developmental biology* 311: 500-11.
121. Christian JL, Moon RT (1993) Interactions between Xwnt-8 and Spemann organizer signaling pathways generate dorsoventral pattern in the embryonic mesoderm of *Xenopus*. *Genes & Development* 7: 13-28.
122. Blum M, Gaunt SJ, Cho KW, Steinbeisser H, Blumberg B, et al. (1992) Gastrulation in the mouse: the role of the homeobox gene goosecoid. *Cell* 69: 1097-106.
123. Tadano T, Otani H, Taira M, Dawid IB (1993) Differential induction of regulatory genes during mesoderm formation in *Xenopus laevis* embryos. *Developmental genetics* 14: 204-11.
124. Lemaire P, Gurdon JB (1994) A role for cytoplasmic determinants in mesoderm patterning: cell-autonomous activation of the goosecoid and Xwnt-8 genes along the dorsoventral axis of early *Xenopus* embryos. *Development* 120: 1191-9.
125. Thisse C, Thisse B, Halpern ME, Postlethwait JH (1994) Goosecoid expression in neurectoderm and mesendoderm is disrupted in zebrafish cyclops gastrulas. *Developmental biology* 164: 420-9.

126. Cross JC, Flannery ML, Blonar MA, Steingrimsson E, Jenkins NA, et al. (1995) Hxt encodes a basic helix-loop-helix transcription factor that regulates trophoblast cell development. *Development* 121: 2513-23.
127. Firulli AB, McFadden DG, Lin Q, Srivastava D, Olson EN (1998) Heart and extra-embryonic mesodermal defects in mouse embryos lacking the bHLH transcription factor Hand1. *Nature Genetics* 18: 266-70.
128. Srivastava D, Cserjesi P, Olson EN (1995) A subclass of bHLH proteins required for cardiac morphogenesis. *Science* 270: 1995-9.
129. Barnes RM, Firulli BA, Conway SJ, Vincentz JW, Firulli AB (2010) Analysis of the Hand1 cell lineage reveals novel contributions to cardiovascular, neural crest, extra-embryonic, and lateral mesoderm derivatives. *Developmental dynamics : an official publication of the American Association of Anatomists* 239: 3086-97.
130. Tsuchihashi T, Maeda J, Shin CH, Ivey KN, Black BL, et al. (2011) Hand2 function in second heart field progenitors is essential for cardiogenesis. *Developmental biology* 351: 62-9.
131. Srivastava D, Thomas T, Lin Q, Kirby ML, Brown D, et al. (1997) Regulation of cardiac mesodermal and neural crest development by the bHLH transcription factor, dHAND. *Nature Genetics* 16: 154-60.
132. Reichenbach B, Delalande JM, Kolmogorova E, Prier A, Nguyen T, et al. (2008) Endoderm-derived Sonic hedgehog and mesoderm Hand2 expression are required for enteric nervous system development in zebrafish. *Developmental biology* 318: 52-64.
133. Vincent SD, Robertson EJ (2004) Targeted insertion of an IRES Cre into the Hnf4alpha locus: Cre-mediated recombination in the liver, kidney, and gut epithelium. *Genesis* 39: 206-11.
134. Weber H, Holewa B, Jones EA, Ryffel GU (1996) Mesoderm and endoderm differentiation in animal cap explants: identification of the HNF4-binding site as an activin A responsive element in the Xenopus HNF1alpha promoter. *Development* 122: 1975-84.
135. Kolm PJ, Sive HL (1995) Regulation of the Xenopus labial homeodomain genes, HoxA1 and HoxD1: activation by retinoids and peptide growth factors. *Developmental biology* 167: 34-49.
136. Thompson JR, Chen SW, Ho L, Langston AW, Gudas LJ (1998) An evolutionary conserved element is essential for somite and adjacent mesenchymal expression of the Hoxa1 gene. *Developmental dynamics : an official publication of the American Association of Anatomists* 211: 97-108.
137. Wendling O, Dennefeld C, Chambon P, Mark M (2000) Retinoid signaling is essential for patterning the endoderm of the third and fourth pharyngeal arches. *Development* 127: 1553-62.

138. Murphy P, Hill RE (1991) Expression of the mouse labial-like homeobox-containing genes, Hox 2.9 and Hox 1.6, during segmentation of the hindbrain. *Development* 111: 61-74.
139. Huang D, Chen SW, Langston AW, Gudas LJ (1998) A conserved retinoic acid responsive element in the murine Hoxb-1 gene is required for expression in the developing gut. *Development* 125: 3235-46.
140. Roche E, Sepulcre P, Reig JA, Santana A, Soria B (2005) Ectodermal commitment of insulin-producing cells derived from mouse embryonic stem cells. *FASEB journal : official publication of the Federation of American Societies for Experimental Biology* 19: 1341-3.
141. Cai CL, Liang X, Shi Y, Chu PH, Pfaff SL, et al. (2003) *Isl1* identifies a cardiac progenitor population that proliferates prior to differentiation and contributes a majority of cells to the heart. *Developmental Cell* 5: 877-89.
142. Nathan E, Monovich A, Tirosh-Finkel L, Harrelson Z, Rousso T, et al. (2008) The contribution of *Isl1*-expressing splanchnic mesoderm cells to distinct branchiomeric muscles reveals significant heterogeneity in head muscle development. *Development* 135: 647-57.
143. Shalaby F, Rossant J, Yamaguchi TP, Gertsenstein M, Wu XF, et al. (1995) Failure of blood-island formation and vasculogenesis in *Fli1*-deficient mice. *Nature* 376: 62-6.
144. Yang L, Soonpaa MH, Adler ED, Roepke TK, Kattman SJ, et al. (2008) Human cardiovascular progenitor cells develop from a *KDR*<sup>+</sup> embryonic-stem-cell-derived population. *Nature* 453: 524-28.
145. Saga Y, Hata N, Kobayashi S, Magnuson T, Seldin MF, et al. (1996) *MesP1*: a novel basic helix-loop-helix protein expressed in the nascent mesodermal cells during mouse gastrulation. *Development* 122: 2769-78.
146. Saga Y, Hata N, Koseki H, Taketo MM (1997) *Mesp2*: a novel mouse gene expressed in the presegmented mesoderm and essential for segmentation initiation. *Genes & Development* 11: 1827-39.
147. Hart AH, Hartley L, Sourris K, Stadler ES, Li R, et al. (2002) *Mixl1* is required for axial mesendoderm morphogenesis and patterning in the murine embryo. *Development* 129: 3597-608.
148. Ng ES, Azzola L, Sourris K, Robb L, Stanley EG, et al. (2005) The primitive streak gene *Mixl1* is required for efficient haematopoiesis and BMP4-induced ventral mesoderm patterning in differentiating ES cells. *Development* 132: 873-84.
149. Acampora D, Avantaggiato V, Tuorto F, Barone P, Perera M, et al. (1999) Differential transcriptional control as the major molecular event in generating *Otx1*<sup>-/-</sup> and *Otx2*<sup>-/-</sup> divergent phenotypes. *Development* 126: 1417-26.
150. Simeone A, Acampora D, Mallamaci A, Stornaiuolo A, D'Apice MR, et al. (1993) A vertebrate gene related to orthodenticle contains a homeodomain of the bicoid class and



- demarcates anterior neuroectoderm in the gastrulating mouse embryo. *Embo J* 12: 2735-47.
151. Schattelman GC, Morrison-Graham K, van Koppen A, Weston JA, Bowen-Pope DF (1992) Regulation and role of PDGF receptor alpha-subunit expression during embryogenesis. *Development* 115: 123-31.
  152. Orr-Urtreger A, Lonai P (1992) Platelet-derived growth factor-A and its receptor are expressed in separate, but adjacent cell layers of the mouse embryo. *Development* 115: 1045-58.
  153. Tada S, Era T, Furusawa C, Sakurai H, Nishikawa S, et al. (2005) Characterization of mesendoderm: a diverging point of the definitive endoderm and mesoderm in embryonic stem cell differentiation culture. *Development* 132: 4363-74.
  154. Shinbrot E, Peters KG, Williams LT (1994) Expression of the platelet-derived growth factor beta receptor during organogenesis and tissue differentiation in the mouse embryo. *Developmental dynamics : an official publication of the American Association of Anatomists* 199: 169-75.
  155. Ghil JS, Chung HM (1999) Evidence that platelet derived growth factor (PDGF) action is required for mesoderm patterning in early amphibian (*Xenopus laevis*) embryogenesis. *The International Journal of Developmental Biology* 43: 329-34.
  156. Wilkinson DG, Bhatt S, Herrmann BG (1990) Expression pattern of the mouse T gene and its role in mesoderm formation. *Nature* 343: 657-9.
  157. Rashbass P, Cooke LA, Herrmann BG, Beddington RS (1991) A cell autonomous function of Brachyury in T/T embryonic stem cell chimaeras. *Nature* 353: 348-51.
  158. Smith JC, Price BM, Green JB, Weigel D, Herrmann BG (1991) Expression of a *Xenopus* homolog of Brachyury (T) is an immediate-early response to mesoderm induction. *Cell* 67: 79-87.
  159. Kispert A, Herrmann BG (1994) Immunohistochemical analysis of the Brachyury protein in wild-type and mutant mouse embryos. *Developmental biology* 161: 179-93.
  160. Kubo A, Shinozaki K, Shannon JM, Kouskoff V, Kennedy M, et al. (2004) Development of definitive endoderm from embryonic stem cells in culture. *Development* 131: 1651-62.
  161. Inman KE, Downs KM (2006) Localization of Brachyury (T) in embryonic and extraembryonic tissues during mouse gastrulation. *Gene Expr Patterns* 6: 783-93.
  162. Takada S, Stark KL, Shea MJ, Vassileva G, McMahon JA, et al. (1994) Wnt-3a regulates somite and tailbud formation in the mouse embryo. *Genes & Development* 8: 174-89.
  163. Gomez E, Gutierrez-Adan A, Diez C, Bermejo-Alvarez P, Munoz M, et al. (2009) Biological differences between in vitro produced bovine embryos and parthenotes. *Reproduction* 137: 285-95.

164. Mann MR, Lee SS, Doherty AS, Verona RI, Nolen LD, et al. (2004) Selective loss of imprinting in the placenta following preimplantation development in culture. *Development* 131: 3727-35.
165. Bai H, Sakurai T, Someya Y, Konno T, Ideta A, et al. (2011) Regulation of trophoblast-specific factors by GATA2 and GATA3 in bovine trophoblast CT-1 cells. *J Reprod Dev* 57: 518-25.
166. Guillemot F, Caspary T, Tilghman SM, Copeland NG, Gilbert DJ, et al. (1995) Genomic imprinting of *Mash2*, a mouse gene required for trophoblast development. *Nature Genetics* 9: 235-42.
167. Holland MP, Bliss SP, Berghorn KA, Roberson MS (2004) A role for CCAAT/enhancer-binding protein beta in the basal regulation of the distal-less 3 gene promoter in placental cells. *Endocrinology* 145: 1096-105.
168. Marchand M, Horcajadas JA, Esteban FJ, McElroy SL, Fisher SJ, et al. (2011) Transcriptomic signature of trophoblast differentiation in a human embryonic stem cell model. *Biology of Reproduction* 84: 1258-71.
169. Rull K, Hallast P, Uuskula L, Jackson J, Punab M, et al. (2008) Fine-scale quantification of HCG beta gene transcription in human trophoblastic and non-malignant non-trophoblastic tissues. *Mol Hum Reprod* 14: 23-31.
170. Rull K, Laan M (2005) Expression of beta-subunit of HCG genes during normal and failed pregnancy. *Human reproduction* 20: 3360-8.
171. Uuskula L, Rull K, Nagirnaja L, Laan M (2011) Methylation allelic polymorphism (MAP) in chorionic gonadotropin beta5 (CGB5) and its association with pregnancy success. *J Clin Endocrinol Metab* 96: E199-207.
172. Ushizawa K, Takahashi T, Hosoe M, Ishiwata H, Kaneyama K, et al. (2007) Global gene expression analysis and regulation of the principal genes expressed in bovine placenta in relation to the transcription factor AP-2 family. *Reprod Biol Endocrinol* 5: 17.
173. Lytras A, Detillieux K, Cattini PA (2011) Identification of functional CCAAT/enhancer-binding protein and Ets protein binding sites in the human chorionic somatomammotropin enhancer sequences. *J Mol Endocrinol* 47: 179-93.
174. Yamada K, Ogawa H, Honda S, Harada N, Okazaki T (1999) A GCM motif protein is involved in placenta-specific expression of human aromatase gene. *The Journal of biological chemistry* 274: 32279-86.
175. Donnison M, Beaton A, Davey HW, Broadhurst R, L'Huillier P, et al. (2005) Loss of the extraembryonic ectoderm in *Elf5* mutants leads to defects in embryonic patterning. *Development* 132: 2299-308.
176. Ng RK, Dean W, Dawson C, Lucifero D, Madeja Z, et al. (2008) Epigenetic restriction of embryonic cell lineage fate by methylation of *Elf5*. *Nature Cell Biology* 10: 1280-90.

177. Pearton DJ, Broadhurst R, Donnison M, Pfeffer PL (2011) Elf5 regulation in the trophoctoderm. *Developmental biology* 360: 343-50.
178. Hemberger M, Udayashankar R, Tesar P, Moore H, Burton GJ (2010) ELF5-enforced transcriptional networks define an epigenetically regulated trophoblast stem cell compartment in the human placenta. *Human Molecular Genetics* 19: 2456-67.
179. Li Y, Lemaire P, Behringer RR (1997) Esx1, a novel X chromosome-linked homeobox gene expressed in mouse extraembryonic tissues and male germ cells. *Developmental biology* 188: 85-95.
180. Wen F, Tynan JA, Cecena G, Williams R, Munera J, et al. (2007) Ets2 is required for trophoblast stem cell self-renewal. *Developmental biology* 312: 284-99.
181. Georgiades P, Rossant J (2006) Ets2 is necessary in trophoblast for normal embryonic anteroposterior axis development. *Development* 133: 1059-68.
182. Yamamoto H, Flannery ML, Kupriyanov S, Pearce J, McKercher SR, et al. (1998) Defective trophoblast function in mice with a targeted mutation of Ets2. *Genes & Development* 12: 1315-26.
183. Basyuk E, Cross JC, Corbin J, Nakayama H, Hunter P, et al. (1999) Murine Gcm1 gene is expressed in a subset of placental trophoblast cells. *Developmental dynamics : an official publication of the American Association of Anatomists* 214: 303-11.
184. Anson-Cartwright L, Dawson K, Holmyard D, Fisher SJ, Lazzarini RA, et al. (2000) The glial cells missing-1 protein is essential for branching morphogenesis in the chorioallantoic placenta. *Nature Genetics* 25: 311-4.
185. Rachmilewitz J, Gileadi O, Eldar-Geva T, Schneider T, de-Groot N, et al. (1992) Transcription of the H19 gene in differentiating cytotrophoblasts from human placenta. *Molecular Reproduction and Development* 32: 196-202.
186. Potgens AJ, Gaus G, Frank HG, Kaufmann P (2001) Characterization of trophoblast cell isolations by a modified flow cytometry assay. *Placenta* 22: 251-5.
187. Jaquemar D, Kupriyanov S, Wankell M, Avis J, Benirschke K, et al. (2003) Keratin 8 protection of placental barrier function. *The Journal of cell biology* 161: 749-56.
188. Aronow BJ, Richardson BD, Handwerger S (2001) Microarray analysis of trophoblast differentiation: gene expression reprogramming in key gene function categories. *Physiol Genomics* 6: 105-16.
189. Gallego MJ, Porayette P, Kaltcheva MM, Bowen RL, Vadakkadath Meethal S, et al. (2010) The pregnancy hormones human chorionic gonadotropin and progesterone induce human embryonic stem cell proliferation and differentiation into neuroectodermal rosettes. *Stem Cell Res Ther* 1: 28.
190. Kojima K, Kanzaki H, Iwai M, Hatayama H, Fujimoto M, et al. (1995) Expression of leukaemia inhibitory factor (LIF) receptor in human placenta: a possible role for LIF in the growth and differentiation of trophoblasts. *Human reproduction* 10: 1907-11.

191. Fant M, Weisoly DL, Cocchia M, Huber R, Khan S, et al. (2002) PLAC1, a trophoblast-specific gene, is expressed throughout pregnancy in the human placenta and modulated by keratinocyte growth factor. *Molecular Reproduction and Development* 63: 430-6.
192. Massabbal E, Parveen S, Weisoly DL, Nelson DM, Smith SD, et al. (2005) PLAC1 expression increases during trophoblast differentiation: evidence for regulatory interactions with the fibroblast growth factor-7 (FGF-7) axis. *Molecular Reproduction and Development* 71: 299-304.
193. Zhou GQ, Baranov V, Zimmermann W, Grunert F, Erhard B, et al. (1997) Highly specific monoclonal antibody demonstrates that pregnancy-specific glycoprotein (PSG) is limited to syncytiotrophoblast in human early and term placenta. *Placenta* 18: 491-501.
194. Camolotto S, Racca A, Rena V, Nores R, Patrio LC, et al. (2010) Expression and transcriptional regulation of individual pregnancy-specific glycoprotein genes in differentiating trophoblast cells. *Placenta* 31: 312-9.
195. Teglund S, Zhou GQ, Hammarstrom S (1995) Characterization of cDNA encoding novel pregnancy-specific glycoprotein variants. *Biochemical and biophysical research communications* 211: 656-64.
196. Lei KJ, Gluzman Y, Pan CJ, Chou JY (1992) Immortalization of virus-free human placental cells that express tissue-specific functions. *Mol Endocrinol* 6: 703-12.
197. Kim J, Zhao K, Jiang P, Lu ZX, Wang J, et al. (2012) Transcriptome landscape of the human placenta. *BMC Genomics* 13: 115.
198. Khan WN, Teglund S, Bremer K, Hammarstrom S (1992) The pregnancy-specific glycoprotein family of the immunoglobulin superfamily: identification of new members and estimation of family size. *Genomics* 12: 780-7.
199. Huch G, Hohn HP, Denker HW (1998) Identification of differentially expressed genes in human trophoblast cells by differential-display RT-PCR. *Placenta* 19: 557-67.
200. Hughes M, Dobric N, Scott IC, Su L, Starovic M, et al. (2004) The Hand1, Stra13 and Gcm1 transcription factors override FGF signaling to promote terminal differentiation of trophoblast stem cells. *Developmental biology* 271: 26-37.
201. Yagi R, Kohn MJ, Karavanova I, Kaneko KJ, Vullhorst D, et al. (2007) Transcription factor TEAD4 specifies the trophectoderm lineage at the beginning of mammalian development. *Development* 134: 3827-36.
202. Nishioka N, Inoue K, Adachi K, Kiyonari H, Ota M, et al. (2009) The Hippo signaling pathway components Lats and Yap pattern Tead4 activity to distinguish mouse trophectoderm from inner cell mass. *Developmental Cell* 16: 398-410.
203. Ralston A, Cox BJ, Nishioka N, Sasaki H, Chea E, et al. (2010) Gata3 regulates trophoblast development downstream of Tead4 and in parallel to Cdx2. *Development* 137: 395-403.

204. Werling U, Schorle H (2002) Transcription factor gene AP-2 gamma essential for early murine development. *Molecular and Cellular Biology* 22: 3149-56.
205. Isermann B, Sood R, Pawlinski R, Zogg M, Kalloway S, et al. (2003) The thrombomodulin-protein C system is essential for the maintenance of pregnancy. *Nature medicine* 9: 331-7.
206. Sood R, Sholl L, Isermann B, Zogg M, Coughlin SR, et al. (2008) Maternal Par4 and platelets contribute to defective placenta formation in mouse embryos lacking thrombomodulin. *Blood* 112: 585-91.
