# Supplementary material for: Genome-Wide Analysis Reveals the Unique Stem Cell Identity of Human Amniocytes
Source: PubMed Central journal article supplement (PMC3542377; doi:10.1371/journal.pone.0053372), 2013-01-10
Supplement: pone.0053372.s007.pdf [file pone.0053372.s007.pdf]

**Table S6.** Timeline and patient samples used in study, related to Figures 1-7. Panel A is the experimental timeline that depicts time since amniocentesis, culture time at ARUP Labs (red bar) and culture time in our lab (green bar). **Table S6B** is a summary of total patient samples used in this study. (Patient samples were de-identified and new patient numbers were given in a general order they were received). (X marks) in table indicates type of analysis tested for each sample. **Table S6C** summarizes RNA-seq samples and read counts. **Table S6D** is a complete list of antibodies used in this study. **Table S6E** is a complete list of primers used in this study.

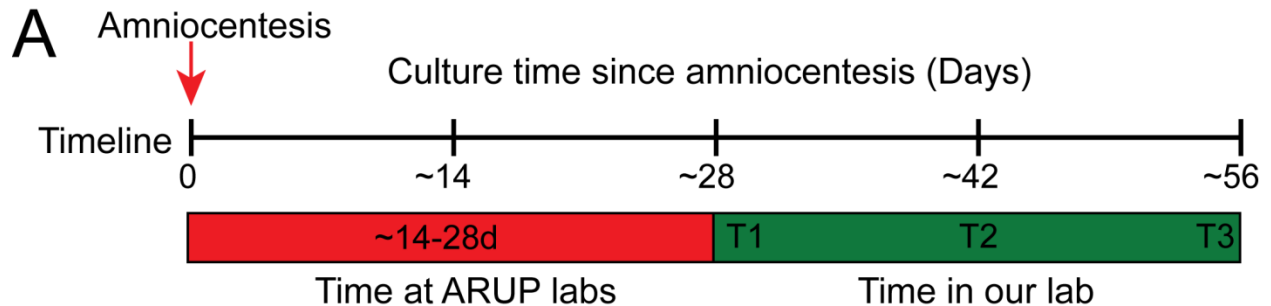

**Table S6B.** Summary of 60 patient samples used in this study.

| Patient | IHC | FACS | qPCR | RNA-seq | Clonal Analysis | G.A. | Gender | T1 | T2 | T3 |
|---------|-----|------|------|---------|-----------------|------|--------|----|----|----|
| A7      | X   |      |      |         |                 | 15   | XX     |    |    |    |
| A8      | X   |      |      |         |                 | 34   | XX     |    |    |    |
| A10     | X   |      |      |         |                 | 16   | XX     |    |    |    |
| A11     | X   |      |      |         |                 | 16   | XX     |    |    |    |
| A19     | X   | X    |      |         |                 | 17   | XY     |    |    |    |
| A26     | X   |      |      |         |                 | 16   | XX     |    |    |    |
| A29     | X   |      |      |         |                 | 19   | XX     |    |    |    |
| A35     | X   |      |      |         |                 | 28   | XY     |    |    |    |
| A39     | X   |      |      |         |                 | 33   | XY     |    |    |    |
| A42     | X   |      |      |         |                 | 15   | XY     |    |    |    |
| A48     | X   |      |      |         |                 | 14   | XY     |    |    |    |
| A49     | X   |      |      |         |                 | 25   | XY     |    |    |    |
| A50     | X   |      |      |         |                 | 30   | XX     |    |    |    |
| A52     | X   |      |      |         |                 | 15   | XX     |    |    |    |
| A53     | X   |      |      |         |                 | 30   | XX     |    |    |    |
| A54     | X   |      |      |         |                 | 15   | XX     |    |    |    |
| A60     |     |      |      | X       |                 | 16   | XY     | X  | X  | X  |
| A63     | X   |      | X    | X       |                 | 15   | XY     | X  | X  | X  |
| A64     |     |      |      | X       |                 | 16   | XY     | X  | X  | X  |
| A65     |     |      | X    | X       |                 | 15   | XY     |    |    |    |
| A67     |     |      | X    | X       |                 | 16   | XX     | X  | X  | X  |
| A68     |     |      | X    | X       |                 | 32   | XY     |    |    |    |
| A70     | X   |      |      |         |                 | 17   | XX     | X  | X  |    |

|      |   |  |   |   |   |    |    |   |   |   |
|------|---|--|---|---|---|----|----|---|---|---|
| A71  | X |  | X | X |   | 15 | XY |   |   |   |
| A72  | X |  | X | X |   | 16 | XY |   |   |   |
| A73  |   |  |   | X |   | 16 | XX | X | X | X |
| A74  | X |  |   | X |   | 17 | XX | X | X | X |
| A77  | X |  | X | X |   | 25 | XX | X | X | X |
| A78  | X |  | X | X |   | 36 | XX | X | X | X |
| A79  | X |  |   |   |   | 16 | XY |   |   |   |
| A81  | X |  | X | X |   | 30 | XY | X | X | X |
| A90  | X |  |   |   |   | 17 | XY |   |   |   |
| A92  | X |  |   |   |   | 30 | XX |   |   |   |
| A94  | X |  |   |   |   | 17 | XX |   |   |   |
| A95  |   |  | X | X |   | 25 | XX | X | X | X |
| A96  |   |  |   | X |   | 35 | XX | X | X | X |
| A97  | X |  |   |   |   | 14 | XY |   |   |   |
| A98  | X |  |   |   |   | 17 | XY |   |   |   |
| A99  | X |  |   |   |   | 18 | XX |   |   |   |
| A101 | X |  |   |   |   | 17 | XY |   |   |   |
| A102 |   |  | X | X |   | 33 | XX |   |   |   |
| A103 |   |  |   | X |   | 33 | XX | X | X | X |
| A104 | X |  |   |   |   | 16 | XX |   |   |   |
| A105 | X |  |   |   |   | 16 | XY |   |   |   |
| A106 |   |  | X | X |   | 35 | XX |   |   |   |
| A108 | X |  |   |   |   | 17 | XY |   |   |   |
| A111 | X |  | X | X |   | 17 | XX |   |   |   |
| A112 | X |  |   |   |   | 17 | XX |   |   |   |
| A113 | X |  | X | X |   | 17 | XY |   |   |   |
| A114 | X |  | X | X |   | 16 | XY |   |   |   |
| A115 | X |  | X | X |   | 17 | XY |   |   |   |
| A116 | X |  |   |   |   | 17 | XY |   |   |   |
| A117 | X |  | X | X |   | 30 | XY |   |   |   |
| A123 | X |  |   |   |   | 30 | XY |   |   |   |
| A190 | X |  |   |   |   | 19 | XX |   |   |   |
| A194 | X |  |   |   |   | 15 | XY |   |   |   |
| A200 | X |  |   |   |   | 28 | XX |   |   |   |
| A203 | X |  |   |   |   | 25 | XX |   |   |   |
| A208 | X |  |   |   |   | 21 | XX |   |   |   |
| FAF2 | X |  |   |   |   | 28 | XX |   |   |   |
| A256 | X |  |   |   |   | 18 | XX |   |   |   |
| A259 | X |  |   |   |   | 16 | XY |   |   |   |
| A262 | X |  |   |   |   | 19 | XY |   |   |   |
| A263 | X |  |   |   |   | 19 | XY |   |   |   |
| A264 | X |  |   |   | X | 16 | XY |   |   |   |
| A265 | X |  |   |   |   | 17 | XY |   |   |   |
| A267 | X |  |   |   |   | 20 | XY |   |   |   |
| A270 |   |  |   |   | X | 22 | XY |   |   |   |
| A272 | X |  |   |   | X | 16 | XY |   |   |   |
| A273 | X |  |   |   | X | 17 | XX |   |   |   |
| A274 | X |  |   |   | X | 17 | XY |   |   |   |
| A275 |   |  |   |   | X | 16 | XX |   |   |   |

|      |   |  |  |  |   |    |    |  |  |  |
|------|---|--|--|--|---|----|----|--|--|--|
| A276 |   |  |  |  | X | 17 | XX |  |  |  |
| A277 |   |  |  |  | X | 26 | XY |  |  |  |
| A279 | X |  |  |  |   | 18 | XY |  |  |  |
| A280 | X |  |  |  |   | 18 | XY |  |  |  |
| A283 | X |  |  |  |   | 12 | XY |  |  |  |
| A285 | X |  |  |  |   | 17 | XX |  |  |  |
| A292 | X |  |  |  |   | 21 | XY |  |  |  |
| A293 | X |  |  |  |   | 37 | XY |  |  |  |

**Table S6C.** Summary of RNA-seq samples and read counts.

| Sample type      | Samples | Annot. reads | Bam reads   | Fq reads      |
|------------------|---------|--------------|-------------|---------------|
| Amniocyte        | 37      | 762,109,834  | 854,402,347 | 1,062,390,986 |
| Fibroblast (NFF) | 3       | 46,912,878   | 58,622,479  | 69,029,796    |
| ESC              | 19      | 341,808,026  | 428,229,138 | 487,291,117   |
| IPSC             | 12      | 208,763,583  | 266,818,498 | 299,695,459   |

**Table S6D.** Complete list of antibodies used in this study.

| Antigen              | Cat #                 | Antigen species | Host | Mono/poly | Isotype | Conc. (Working Dilution) | Staining detected in amniocytes |
|----------------------|-----------------------|-----------------|------|-----------|---------|--------------------------|---------------------------------|
| $\alpha$ -Actinin    | Sigma (A7732)         | Rabbit          | M    | M         | IgG1    | 1.0mg/ml (1:300)         | Yes                             |
| Cgb1                 | Abcam (ab9376)        | Human           | Rb   | P         | IgG     | N/A (1:300)              | No                              |
| cKit                 | Millipore (MAB1163)   | Human           | M    | M         | IgG2a   | 1mg/ml (1:200)           | No                              |
| cKit                 | Biologend (313201)    | Human           | M    | M         | IgG1    | 0.5mg/ml (1:200)         | No                              |
| cKit                 | Cell Signaling (Ab81) | Human           | M    | M         | IgG1    | N/A (1:200)              | Yes                             |
| c-myc                | DSHB (9E10)           | Human           | M    | M         | IgG1    | 50ug/ml (1:50)           | No                              |
| $\alpha$ -Fetoprotei | R&D Systems           | Human           | M    | M         | IgG1    | 500ug/ml                 | Yes                             |

|       |                                |                 |    |   |       |                   |     |
|-------|--------------------------------|-----------------|----|---|-------|-------------------|-----|
| n     | (MAB1368)                      |                 |    |   |       | (1:300)           |     |
| JMJD3 | Novus Biologicals (NBP1-06640) | Mouse           | Rb | P | IgG   | 1.75mg/ml (1:500) | No  |
| Klf4  | Millipore (09-821)             | Synthetic mouse | Rb | P | IgG   | N/A (1:300)       | Yes |
| Lin28 | Cell Signaling (3695)          | human           | Rb | P | IgG   | N/A (1:200)       | No  |
| Nanog | Abcam (ab21624)                | Human           | Rb | P | IgG   | 0.2mg/ml (1:200)  | No  |
| Nanog | Cell signaling (4903)          | Human           | Rb | P | IgG   | N/A (1:200)       | No  |
| Nanog | Millipore (AB5731)             | Mouse           | Rb | P | IgG   | 1.9mg/ml (1:200)  | Yes |
| Oct4  | Abcam (19857)                  | Human           | Rb | P | IgG   | 0.6mg/ml (1:200)  | Yes |
| Oct4  | Cell Signaling (2750)          | Human           | Rb | P | IgG   | N/A (1:200)       | No  |
| Oct4  | Santa Cruz (sc-9081)           | Human           | Rb | P | IgG   | 200ug/ml (1:200)  | Yes |
| PCNA  | Abcam (Ab29)                   | Rat             | M  | M | IgG2a | 1mg/ml (1:300)    | Yes |
| PH3   | Santa Cruz (sc-8656-R)         | Human           | Rb | P | IgG   | 200ug/ml (1:300)  | Yes |
| Sox2  | Cell Signaling (5024)          | Human           | Rb | P | IgG   | N/A (1:200)       | Yes |
| Sox2  | Cell Signaling (3509)          | Human           | Rb | P | IgG   | N/A (1:200)       | No  |
| Sox2  | BioLegend (630802)             | Human           | Rb | P | IgG   | 0.25mg/ml (1:200) | Yes |

|               |                       |       |      |   |       |                        |              |
|---------------|-----------------------|-------|------|---|-------|------------------------|--------------|
| Sox17         | R&D Systems (AF1924)  | Human | Goat | P | IgG   | 0.2mg/ml (1:300)       | Yes          |
| SM22 $\alpha$ | Abcam (ab14106)       | Mouse | Rb   | P | IgG   | N/A (1:800)            | Yes          |
| SSEA1         | DSHB (MC-480)         | Mouse | M    | M | IgM   | 28ug/ml (1:50)         | Yes          |
| SSEA3         | DSHB (MC-631)         | Rat   | M    | M | IgM   | 40ug/ml (1:50)         | Yes          |
| SSEA4         | DSHB (MC-813-70)      | Mouse | M    | M | IgG3  | 52ug/ml (1:50)         | Yes          |
| Tra-1-60      | Millipore (MAB4360)   | Human | M    | M | IgM   | 1mg/ml (1:300)         | Yes          |
| Tra-1-60      | Cell Signaling (4746) | Human | M    | M | IgM   | N/A (1:300)            | No           |
| Tra-1-81      | Millipore (MAB4381)   | Human | M    | M | IgM   | 1mg/ml (1:300)         | Yes          |
| Tra-1-81      | Abcam (ab16289)       | Human | M    | M | IgM   | 1mg/ml (1:300)         | No           |
| Tra-2-49      | DSHB (6E)             | Mouse | M    | M | IgG1  | 36ug/ml (1:50)         | No           |
| Tra-2-54      | DSHB (2J)             | Mouse | M    | M | IgG1  | 16ug/ml (1:50)         | No           |
| Tubb3         | Abcam (ab78078)       | Rat   | M    | M | IgG2a | 1mg/ml (1:300)         | Yes          |
| TSA-1         | Santa Cruz (sc-23087) | Human | G    | P | IgG   | 200 $\mu$ g/ml (1:200) | Questionable |
| Wdr5          | Abcam                 | Human | M    | M | IgG2b | 0.50mg/ml (1:200)      | Yes          |

**Table S6E.** Genes, accession numbers, and primer sets used in this study.

| <u>Gene</u> | <u>Ensgene_id</u> | <u>Refseq_id</u> | <u>Marker</u> | <u>Forward Seq (5'-3')</u> |
|-------------|-------------------|------------------|---------------|----------------------------|
|-------------|-------------------|------------------|---------------|----------------------------|

|                      |                 |              |                                       | <b>Reverse Seq (5'-3')</b> |
|----------------------|-----------------|--------------|---------------------------------------|----------------------------|
| <b>Oct4 (Pou5f1)</b> | ENSG00000204531 | NM_001173531 | Puripotency/iPSC factor               | caatttgccaagctcctga        |
|                      |                 |              |                                       | cagatggctcttttggtgaac      |
| <b>Sox2</b>          | ENSG00000181449 | NM_003106    | Pluripotency/iPSC factor              | ctccgggacatgatcagc         |
|                      |                 |              |                                       | ggtagtgctgggacatgtgaa      |
| <b>Nanog</b>         | ENSG00000111704 | NM_024865    | Pluripotency/iPSC factor              | tccaacatcctgaacctca        |
|                      |                 |              |                                       | ttgctattcttcggccagtt       |
| <b>Klf4</b>          | ENSG00000136826 | NM_004235    | Transcriptional repressor/iPSC factor | gggagaagacactgctca         |
|                      |                 |              |                                       | ggaagcactgggggaagt         |
| <b>Wdr5</b>          | ENSG00000196363 | NM_017588    | Pluripotency                          | agagtggtggaagttcat         |
|                      |                 |              |                                       | tgacgaccaggctacatcg        |
| <b>Fut4</b>          | ENSG00000196371 | NM_002033    | Pluripotency                          | tcttggtgtaccgggattc        |
|                      |                 |              |                                       | aggttacctcaaaacctgaactc    |
| <b>Kit (ckit)</b>    | ENSG00000157404 | NM_000222    | Stem cell marker                      | gcagattcagagagcacca        |
|                      |                 |              |                                       | gtcgtgcacaagcagagg         |
| <b>Gapdh</b>         | ENSG00000111640 | NM_002046    | Reference                             | ctctgctcctctgttcgac        |
|                      |                 |              |                                       | gccaatacgaccaaatcc         |
